# Supplementary material for: Bladder cancer intrinsic LRFN2 drives anticancer immunotherapy resistance by attenuating CD8+ T cell infiltration and functional transition
Source: PubMed Central journal article supplement — J Immunother Cancer. 2023 Oct 6;11(10):e007230. doi: 10.1136/jitc-2023-007230 (PMC10565151; doi:10.1136/jitc-2023-007230), 2023-10-06

## Inflamed phenotype

CK19+CD8+TCF-1+PD-1+LRFN2+DAPI

Pt.1

Pt.2

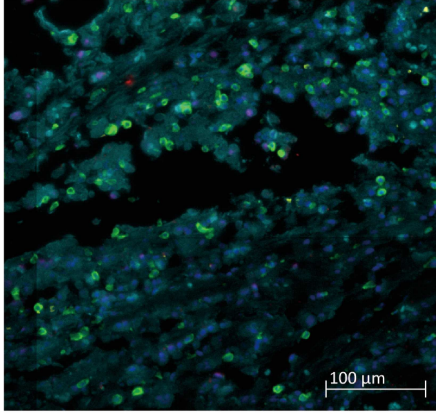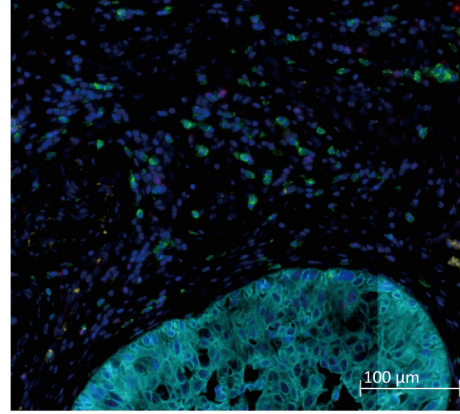

Pt.3

Pt.4

Pt.5

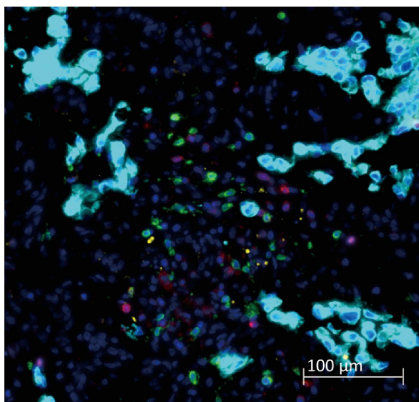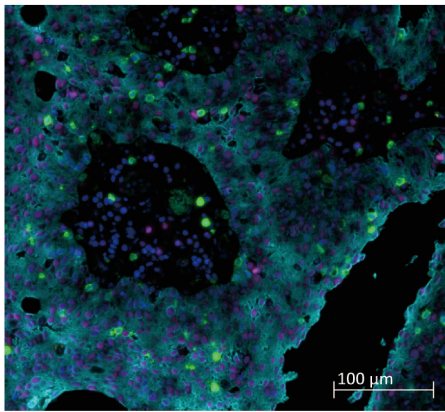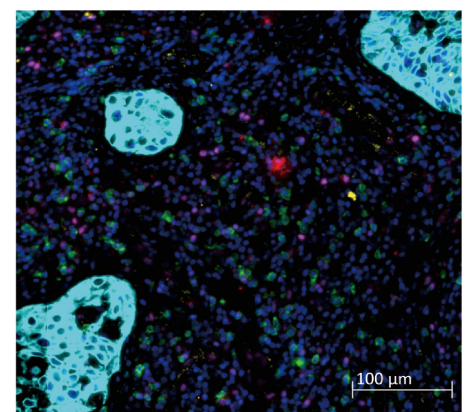

## Non-Inflamed phenotype

CK19+CD8+TCF-1+PD-1+LRFN2+DAPI

Pt.6

Pt.7

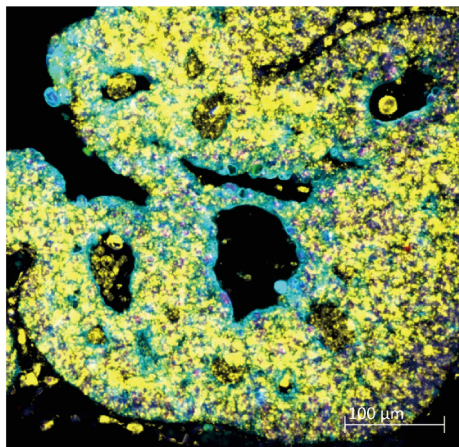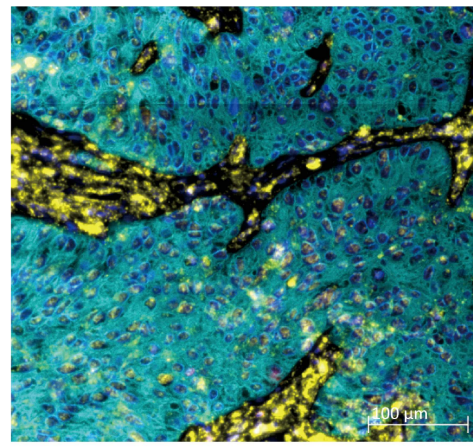

Pt.8

Pt.9

Pt.10

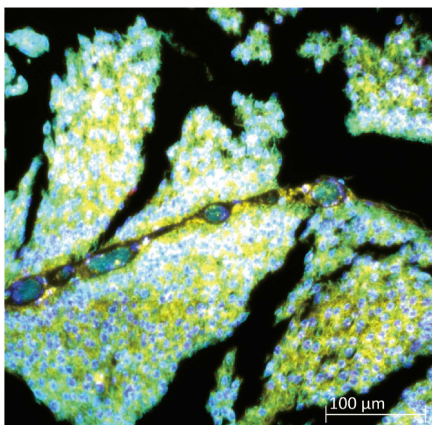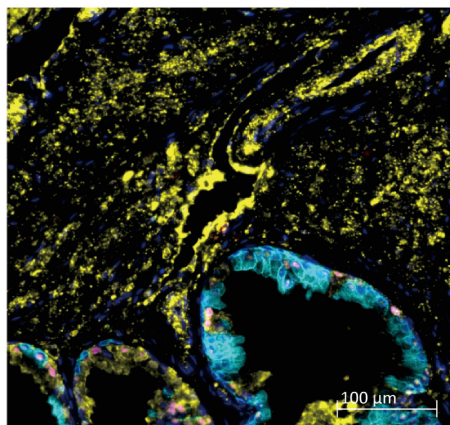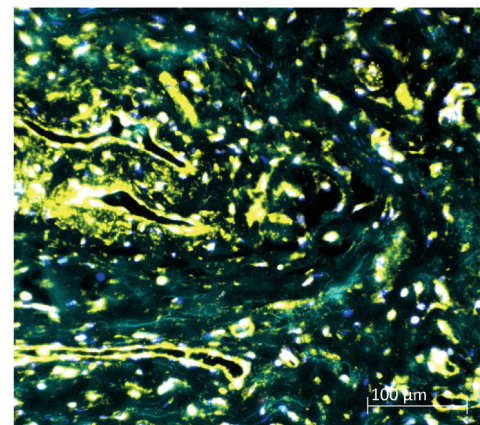

Supplement: jitc-2023-007230supp019.pdf [file jitc-2023-007230supp019.pdf]
