# Supplementary figures and images for: Bladder cancer intrinsic LRFN2 drives anticancer immunotherapy resistance by attenuating CD8+ T cell infiltration and functional transition
Source: PubMed Central journal article supplement — J Immunother Cancer. 2023 Oct 6;11(10):e007230. doi: 10.1136/jitc-2023-007230 (PMC10565151; doi:10.1136/jitc-2023-007230), 2023-10-06

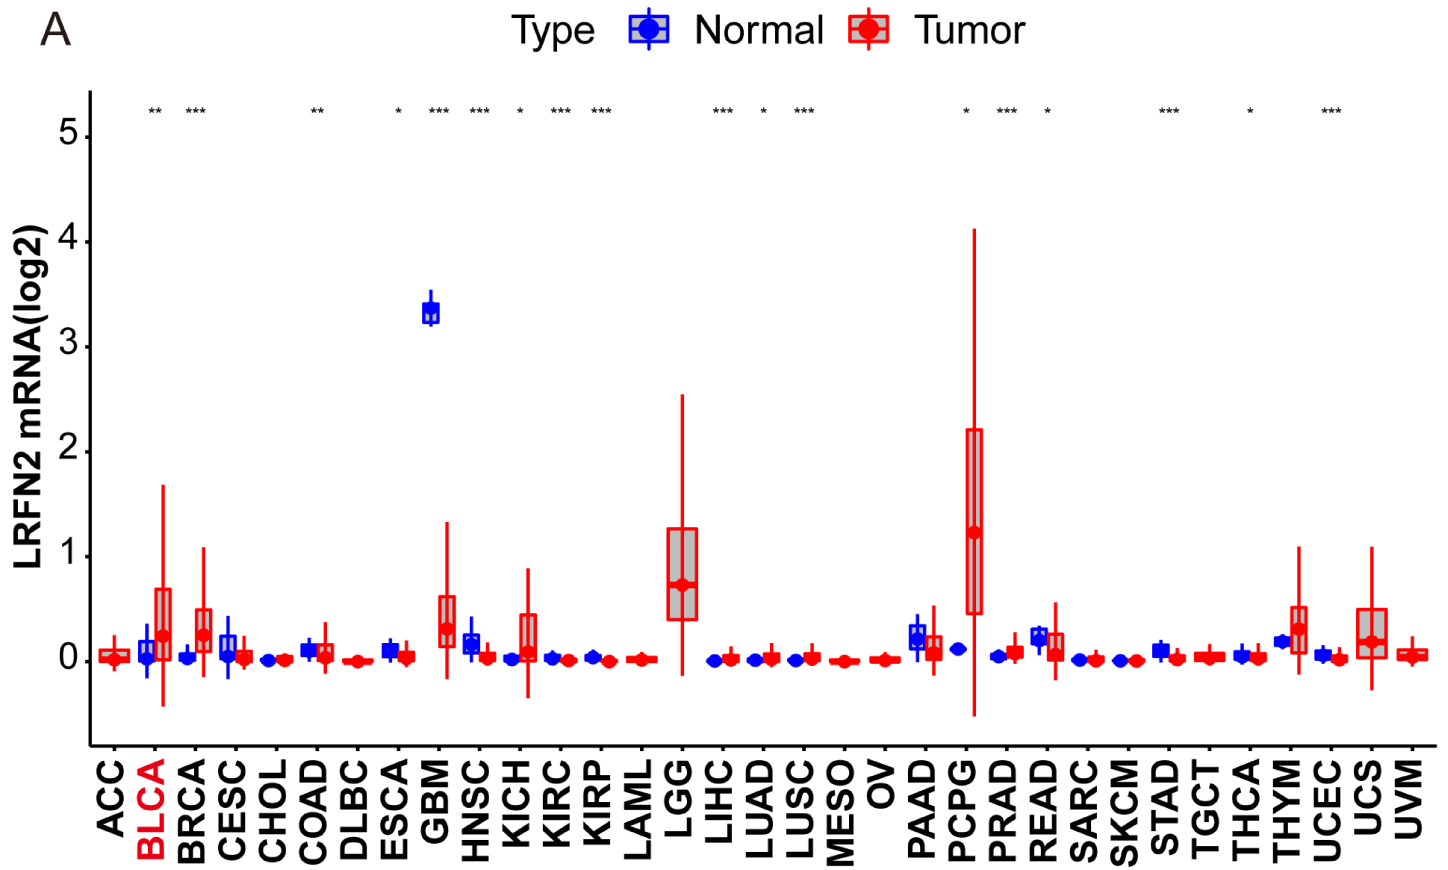**B**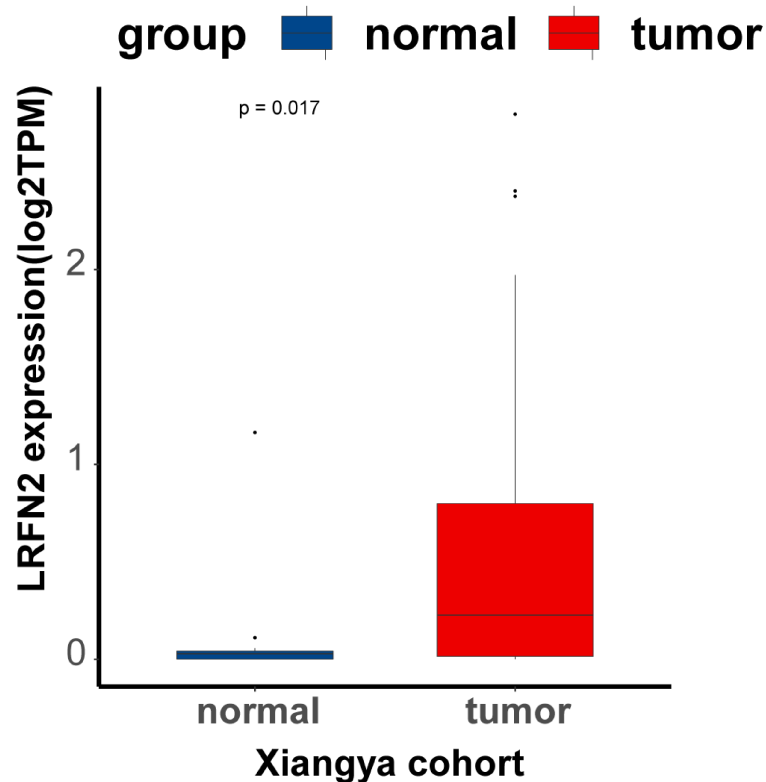

Supplement: jitc-2023-007230supp001.pdf [file jitc-2023-007230supp001.pdf]

**A**

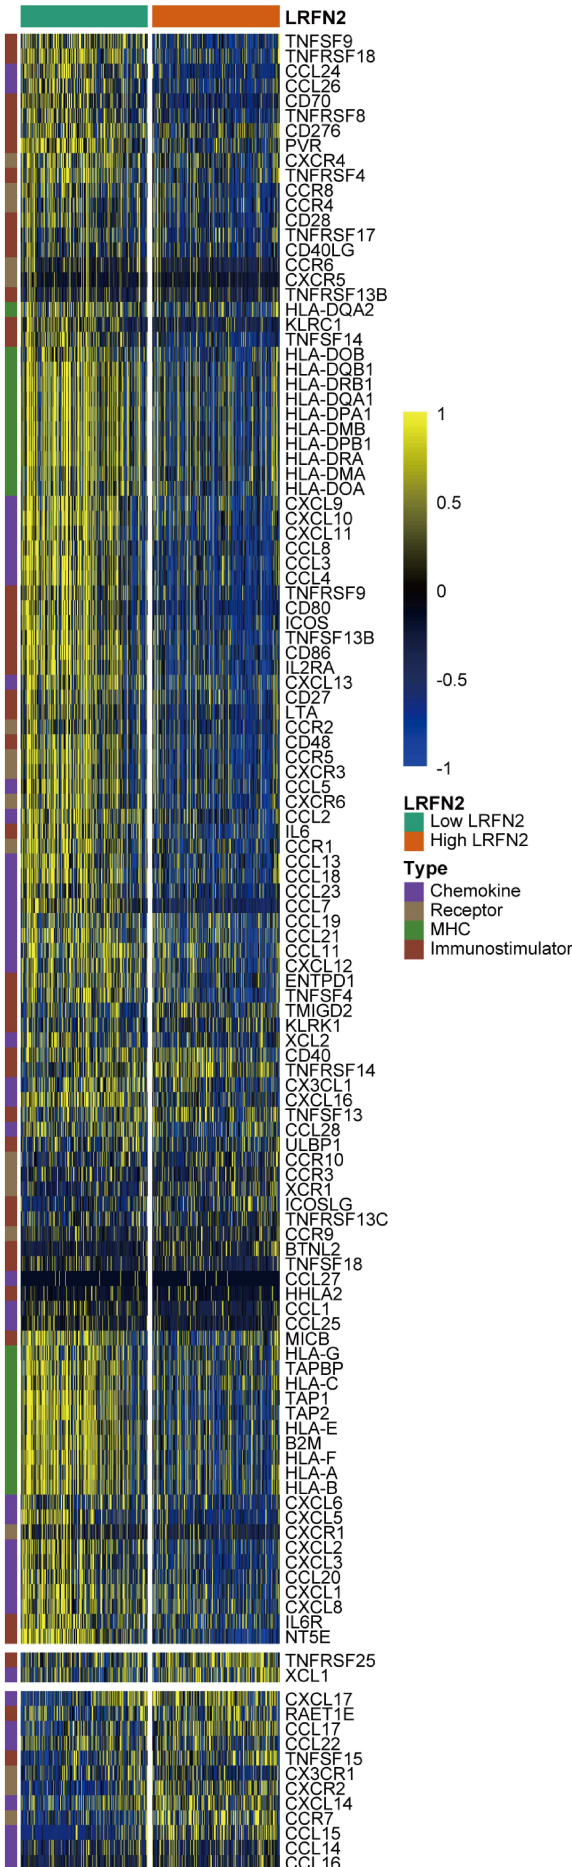

**B**

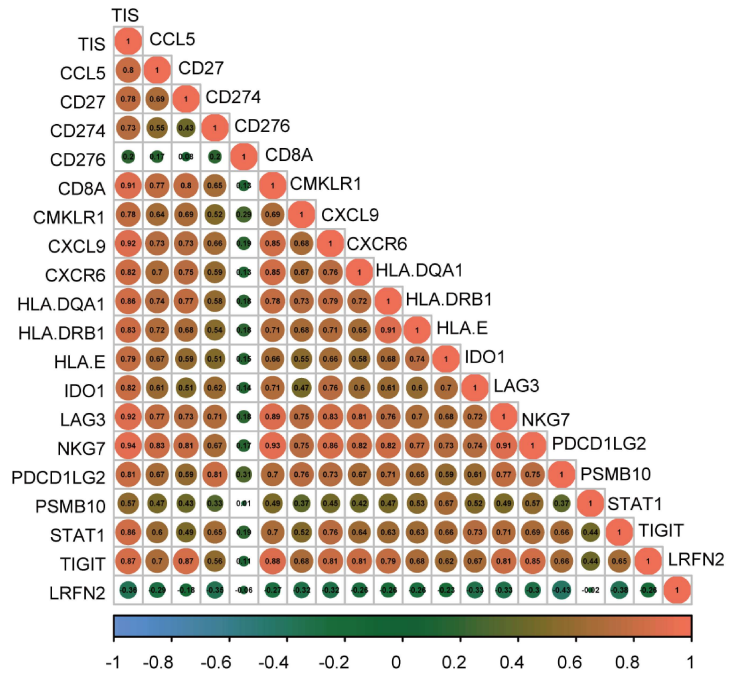

**C**

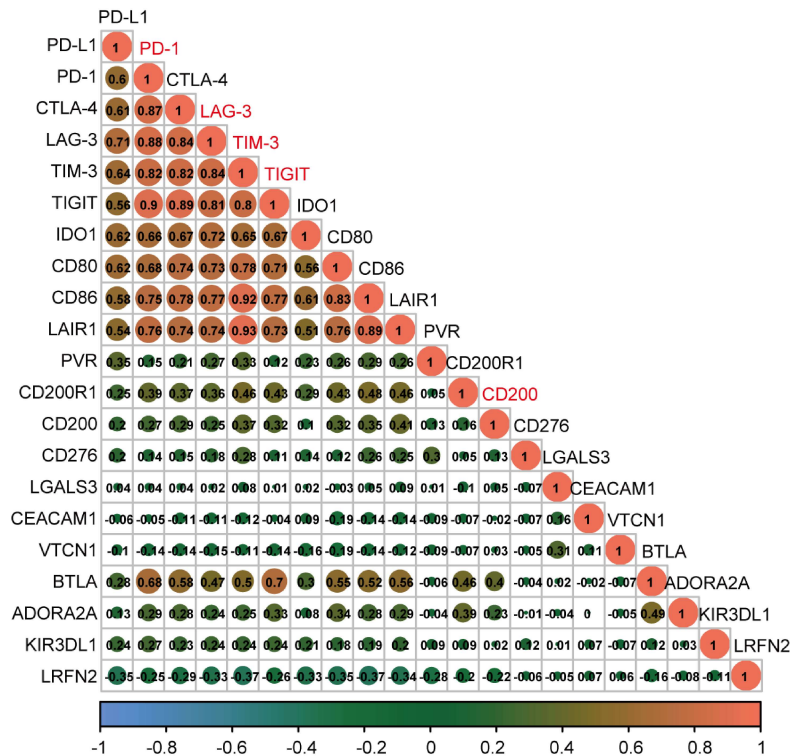

Supplement: jitc-2023-007230supp003.pdf [file jitc-2023-007230supp003.pdf]

A

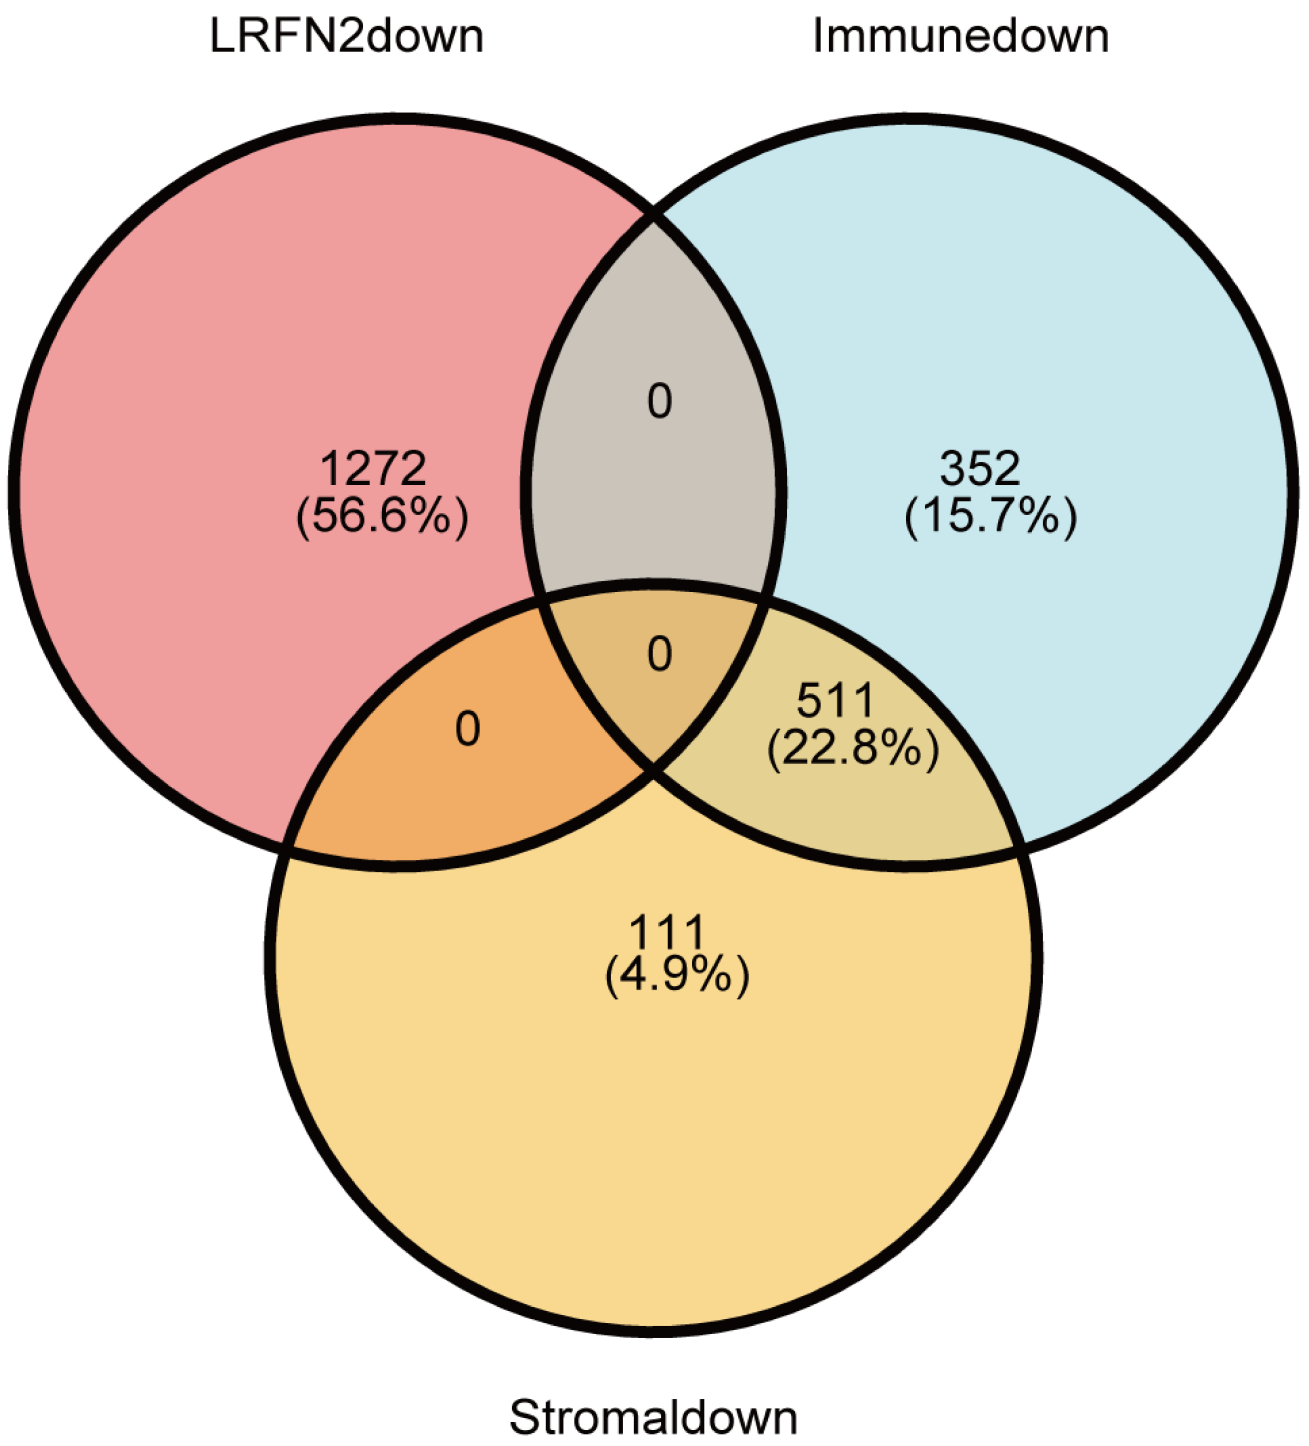

B

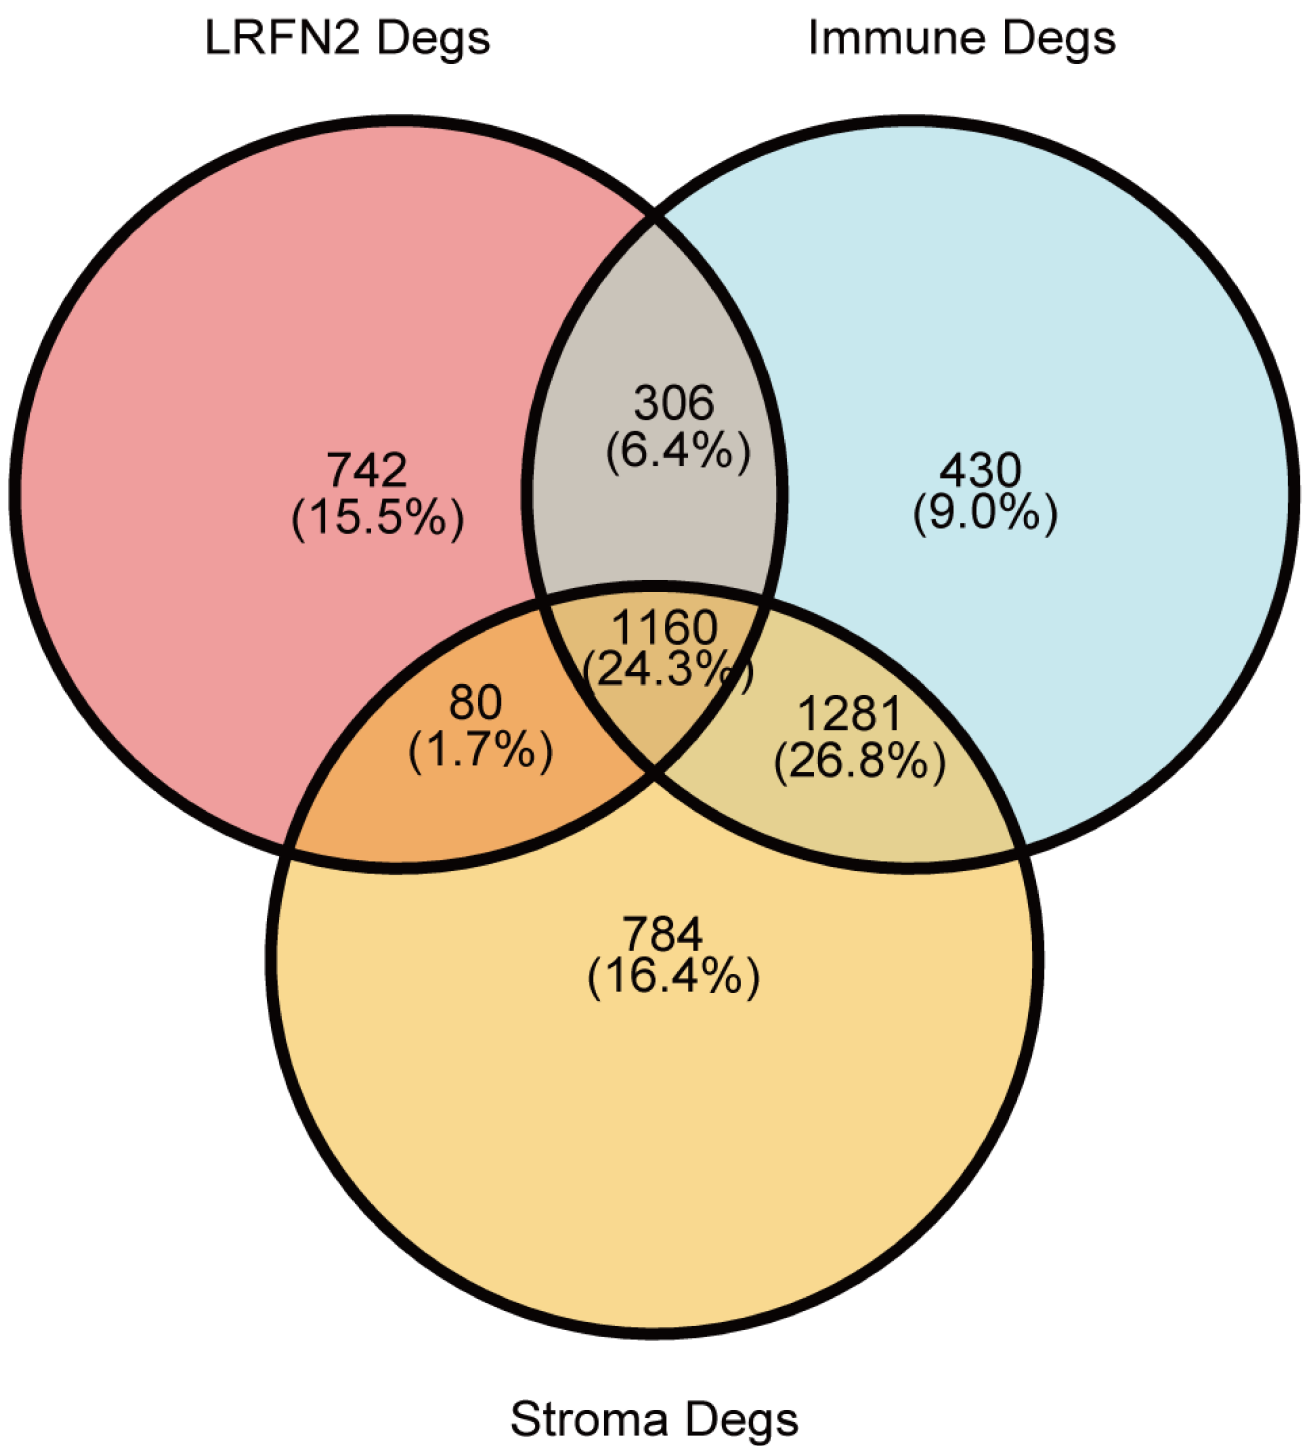

Supplement: jitc-2023-007230supp004.pdf [file jitc-2023-007230supp004.pdf]

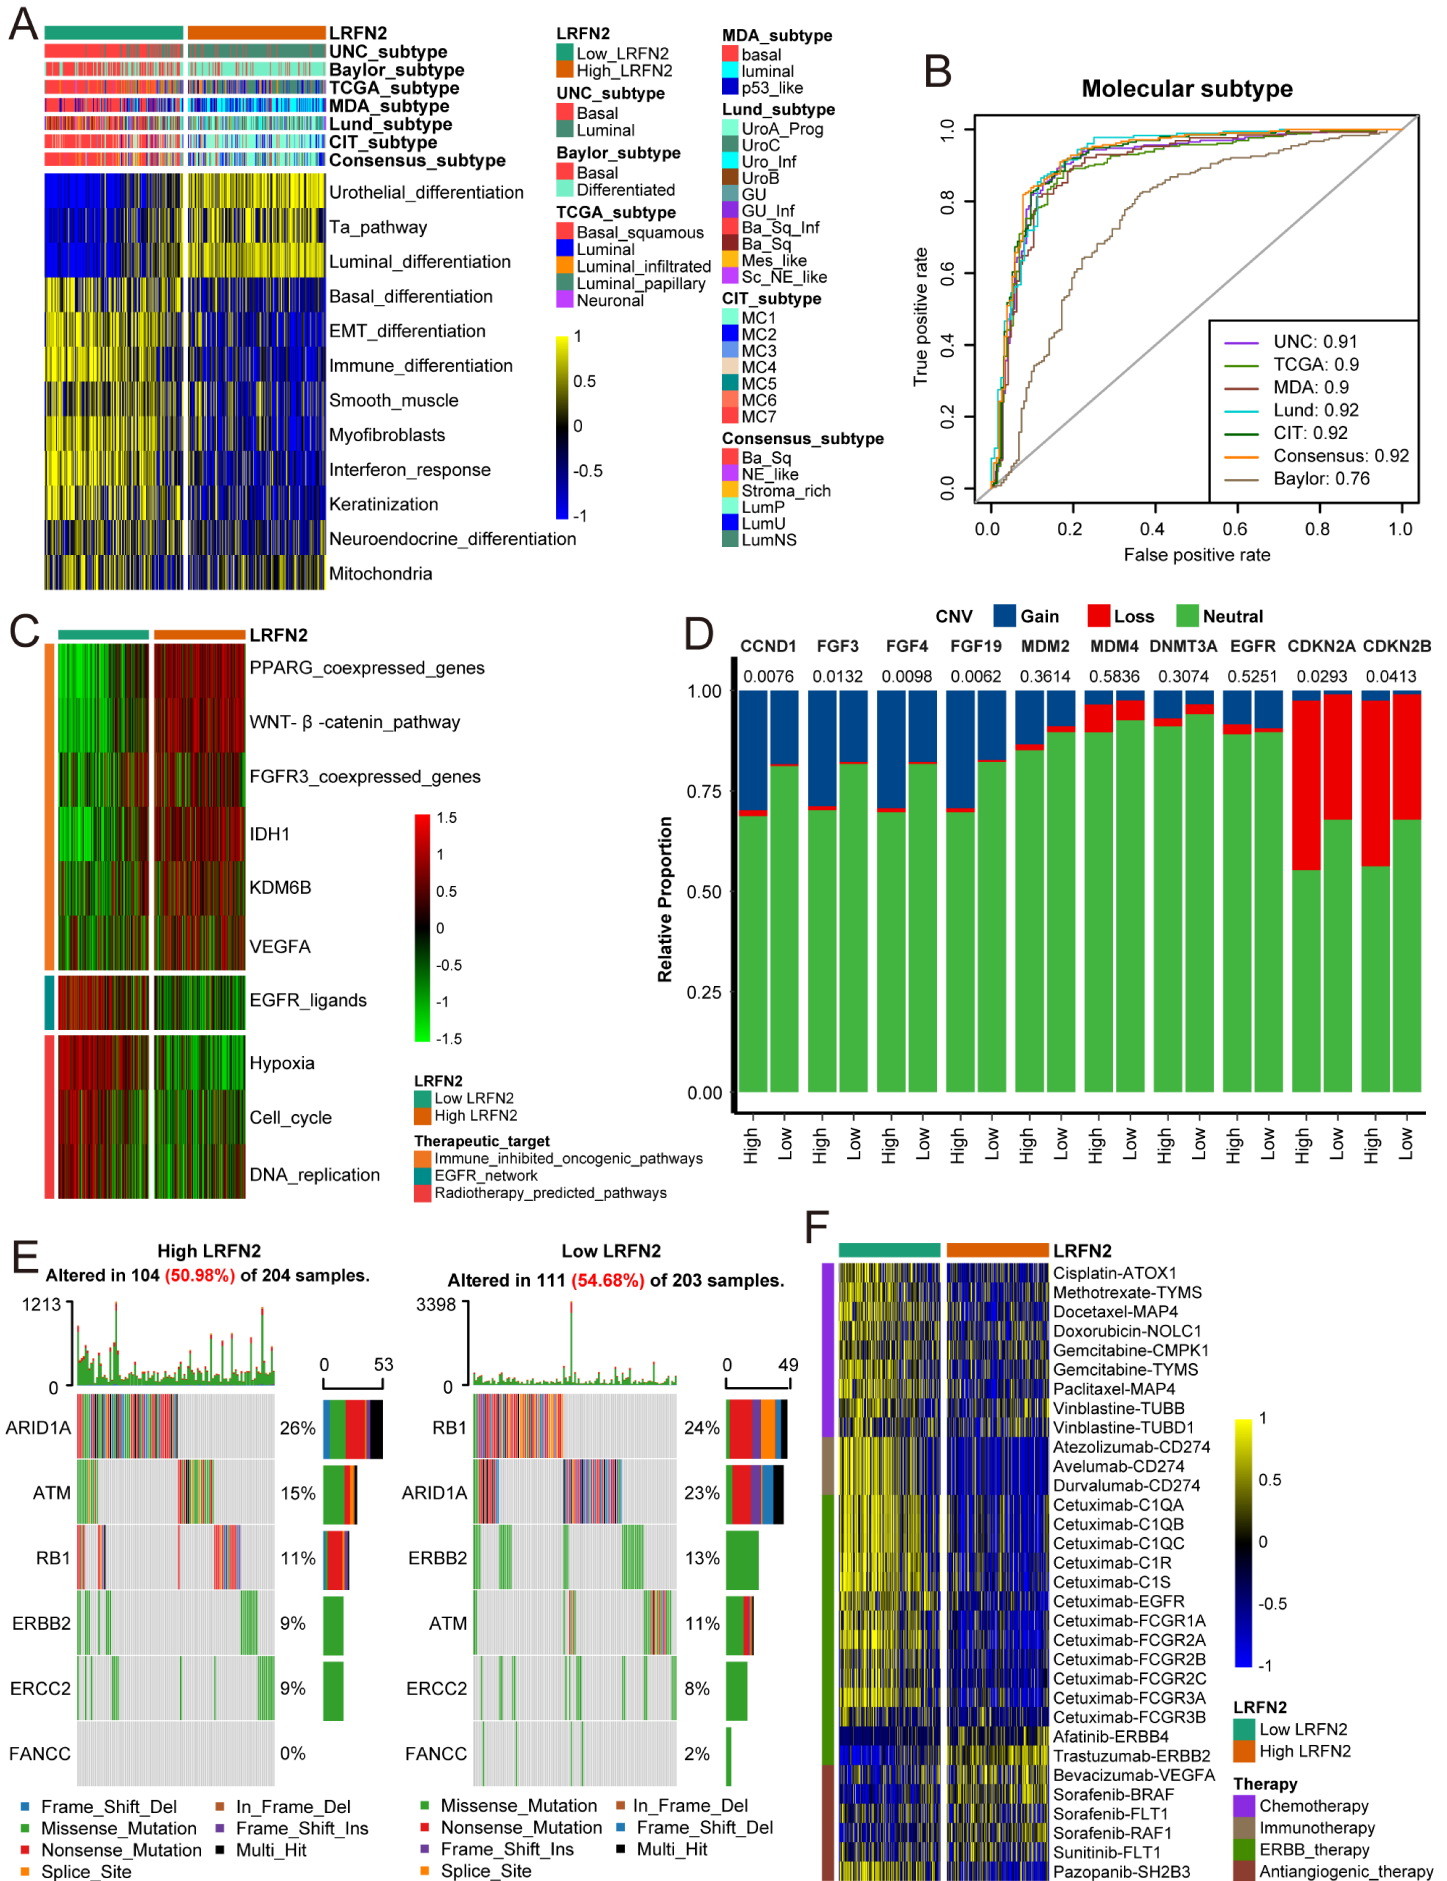

Supplement: jitc-2023-007230supp005.pdf [file jitc-2023-007230supp005.pdf]

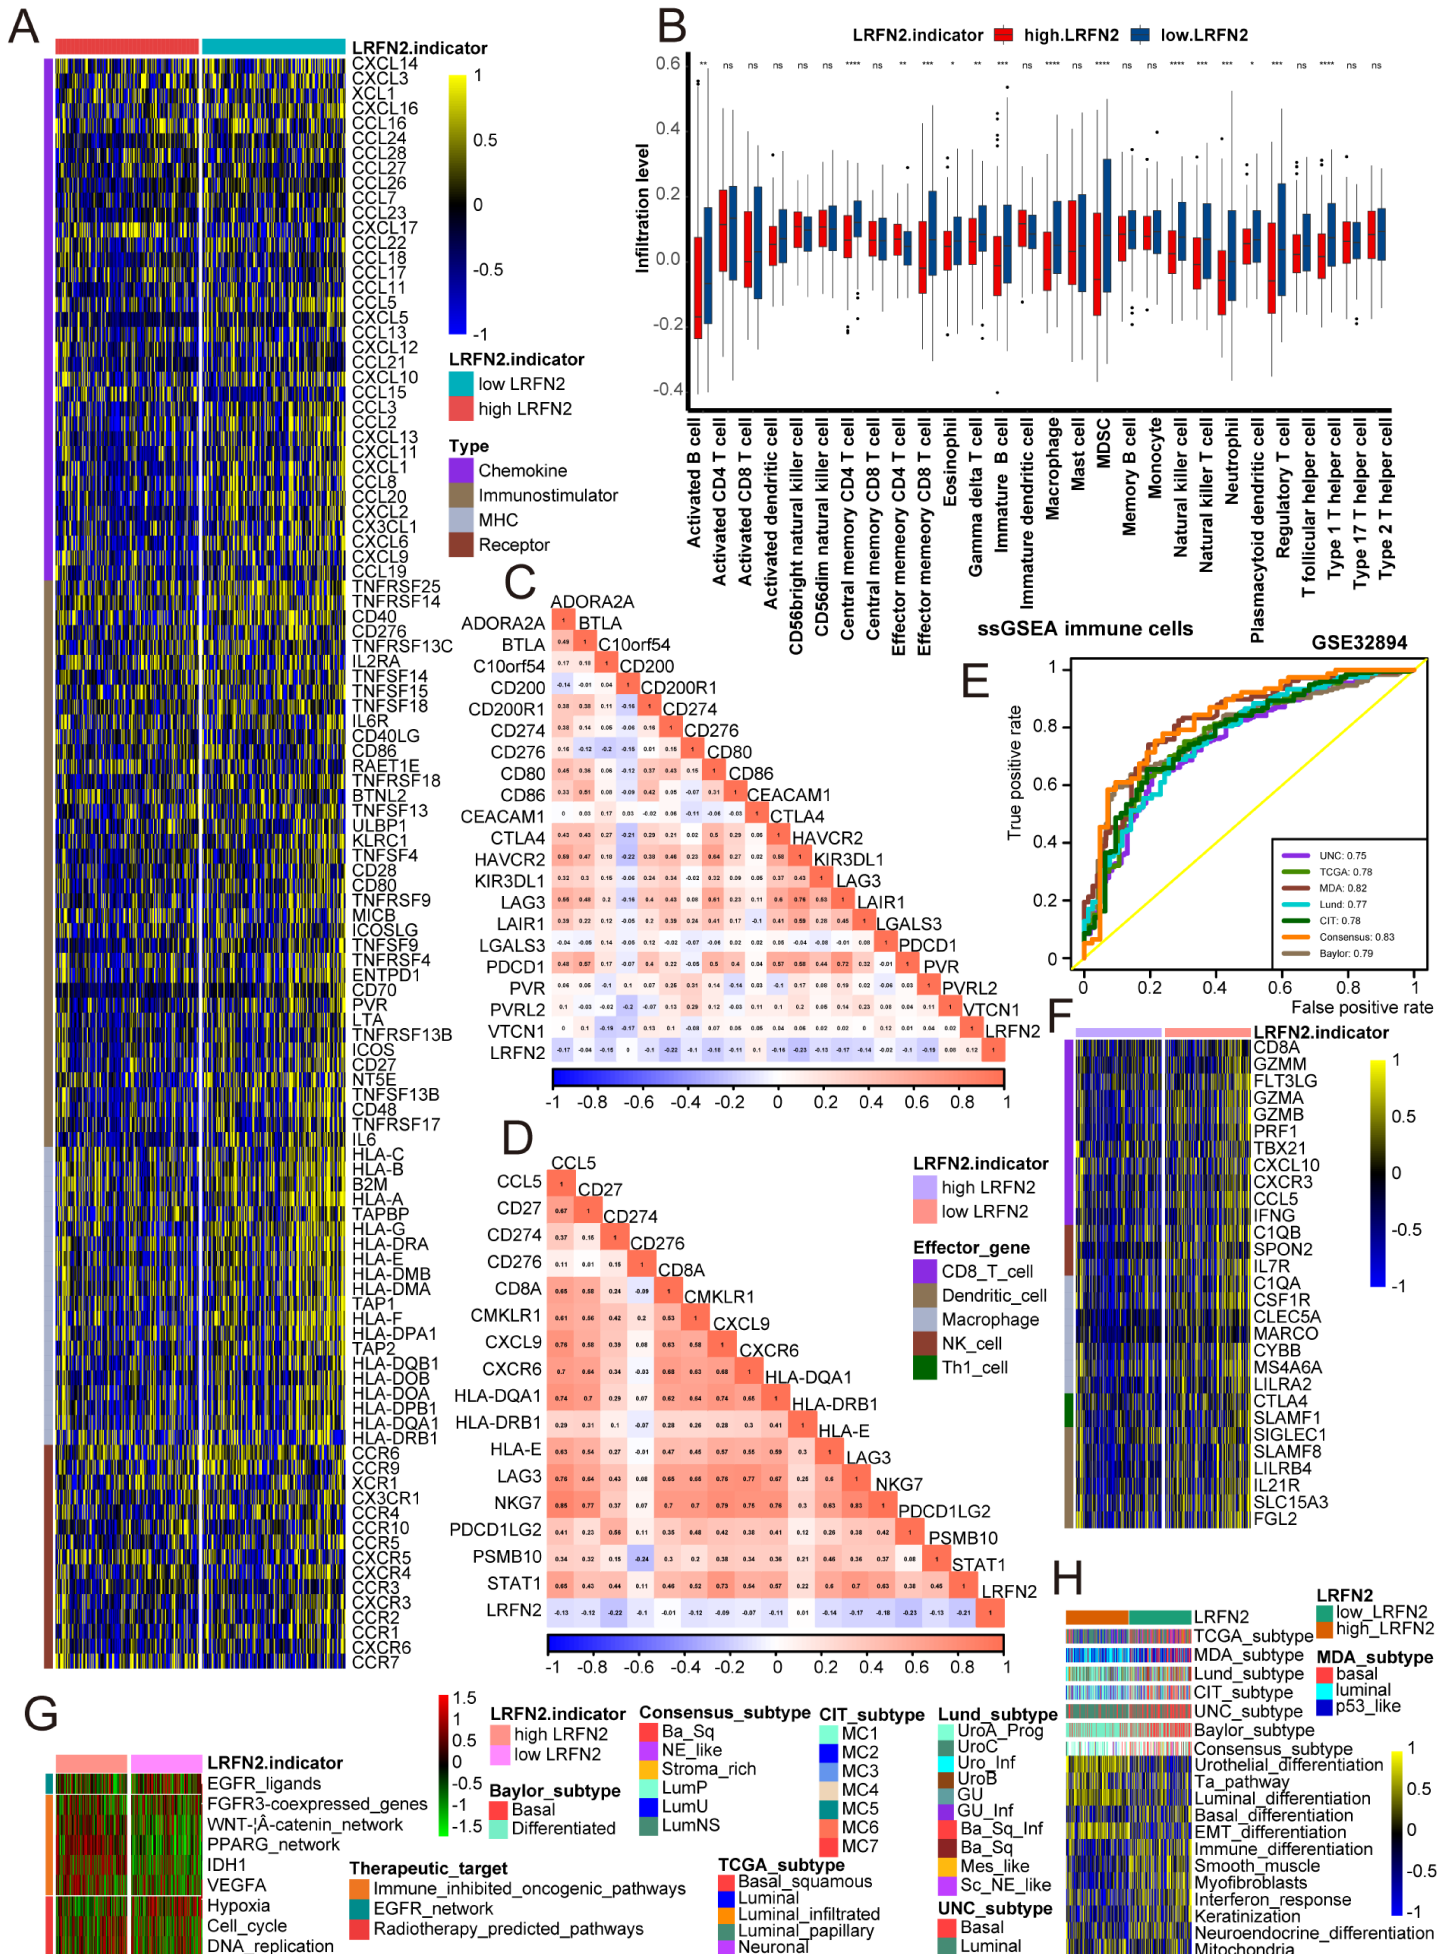

Supplement: jitc-2023-007230supp006.pdf [file jitc-2023-007230supp006.pdf]

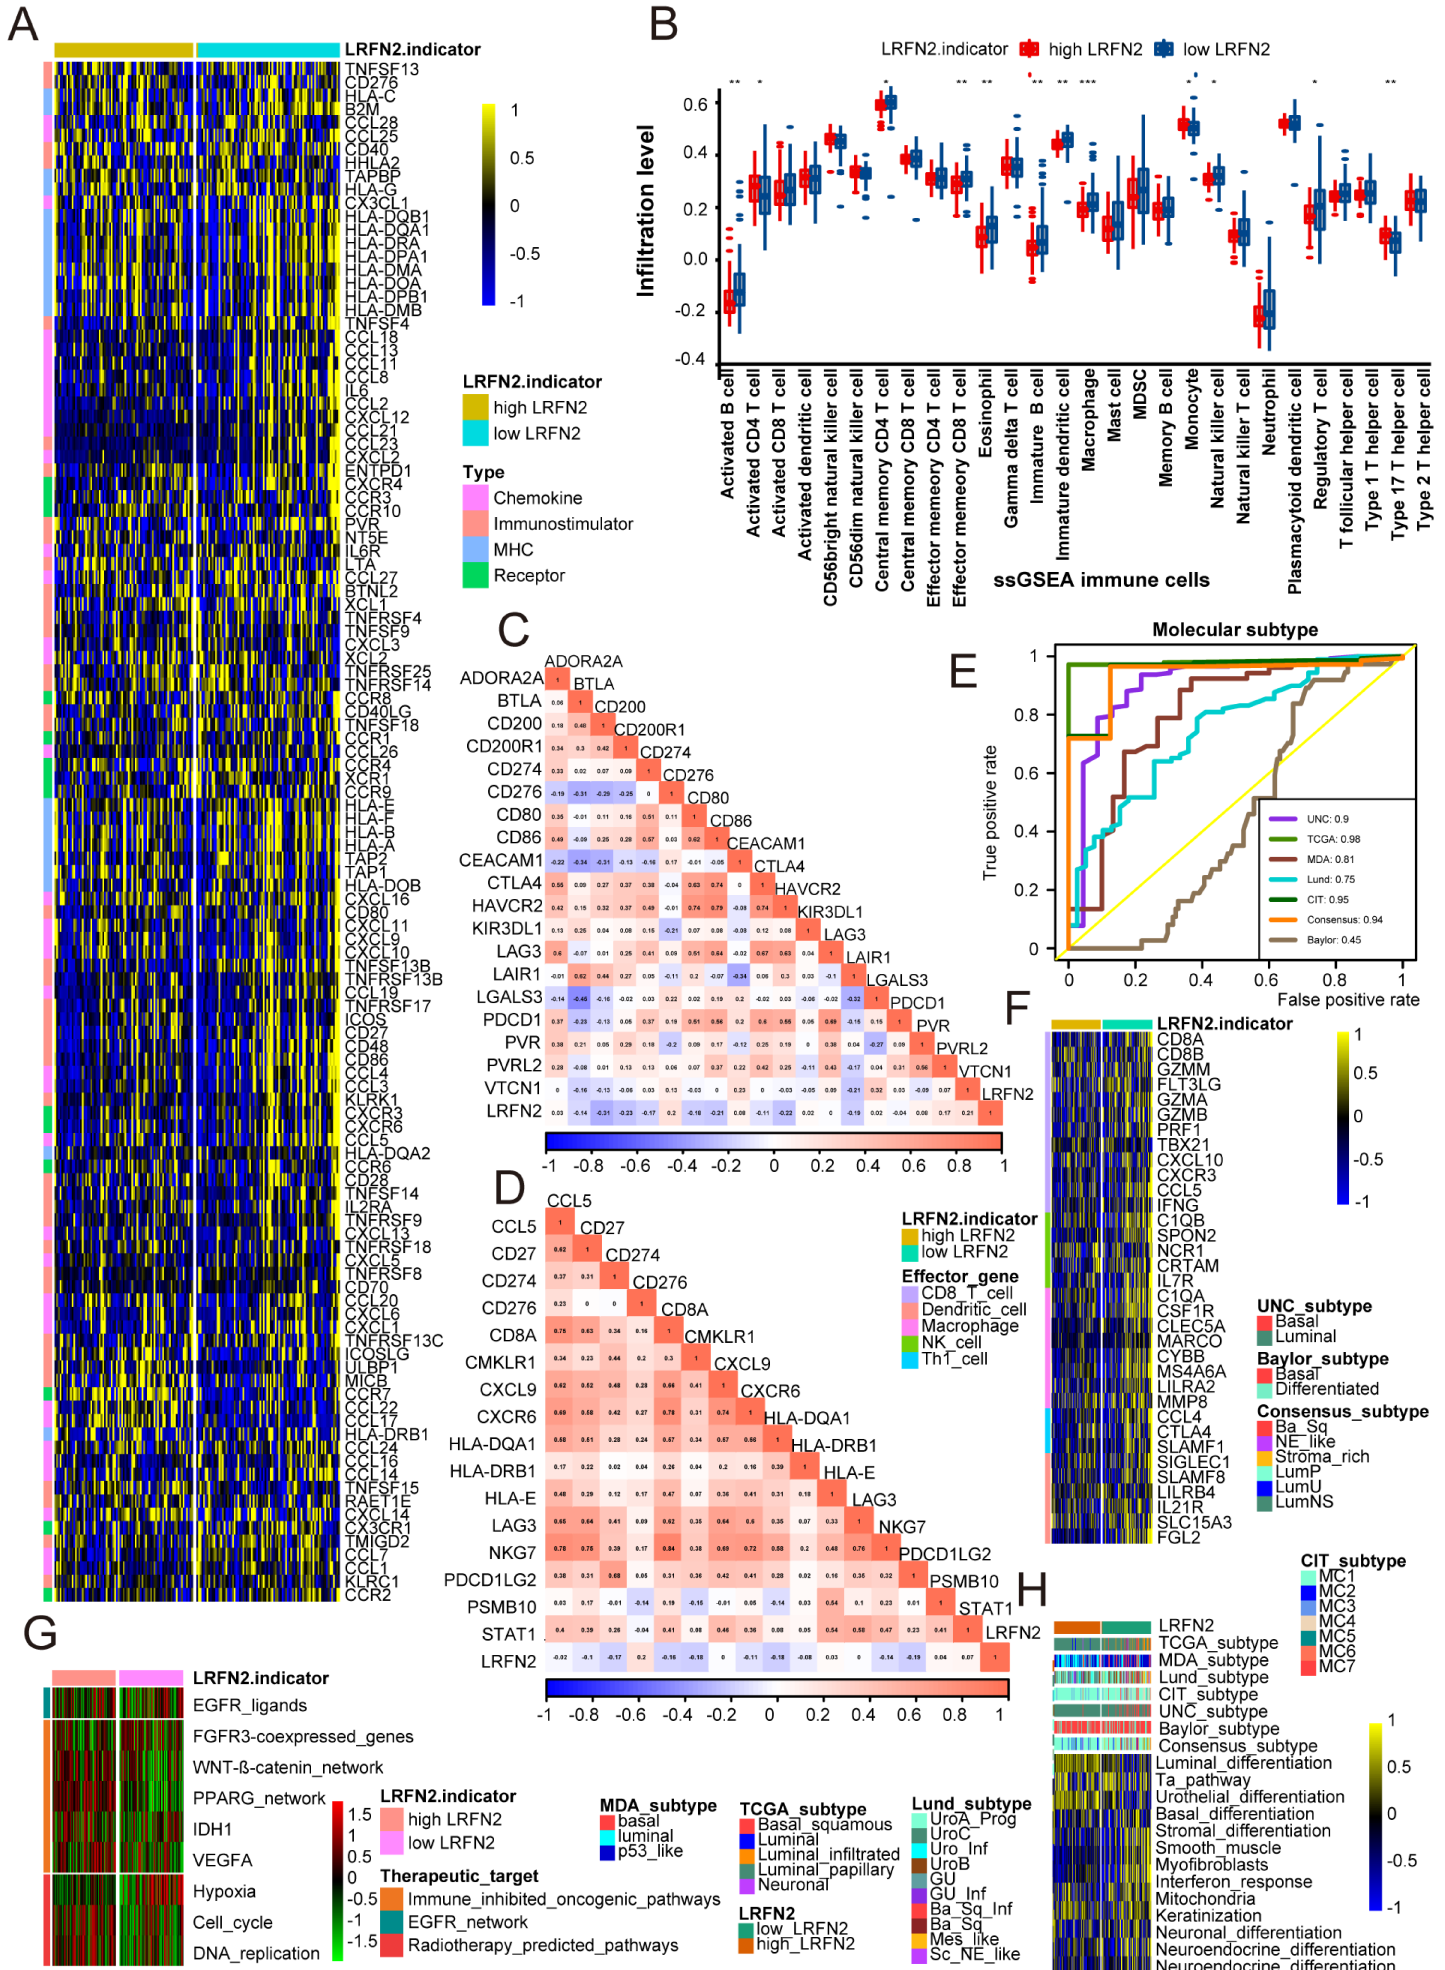

Supplement: jitc-2023-007230supp007.pdf [file jitc-2023-007230supp007.pdf]

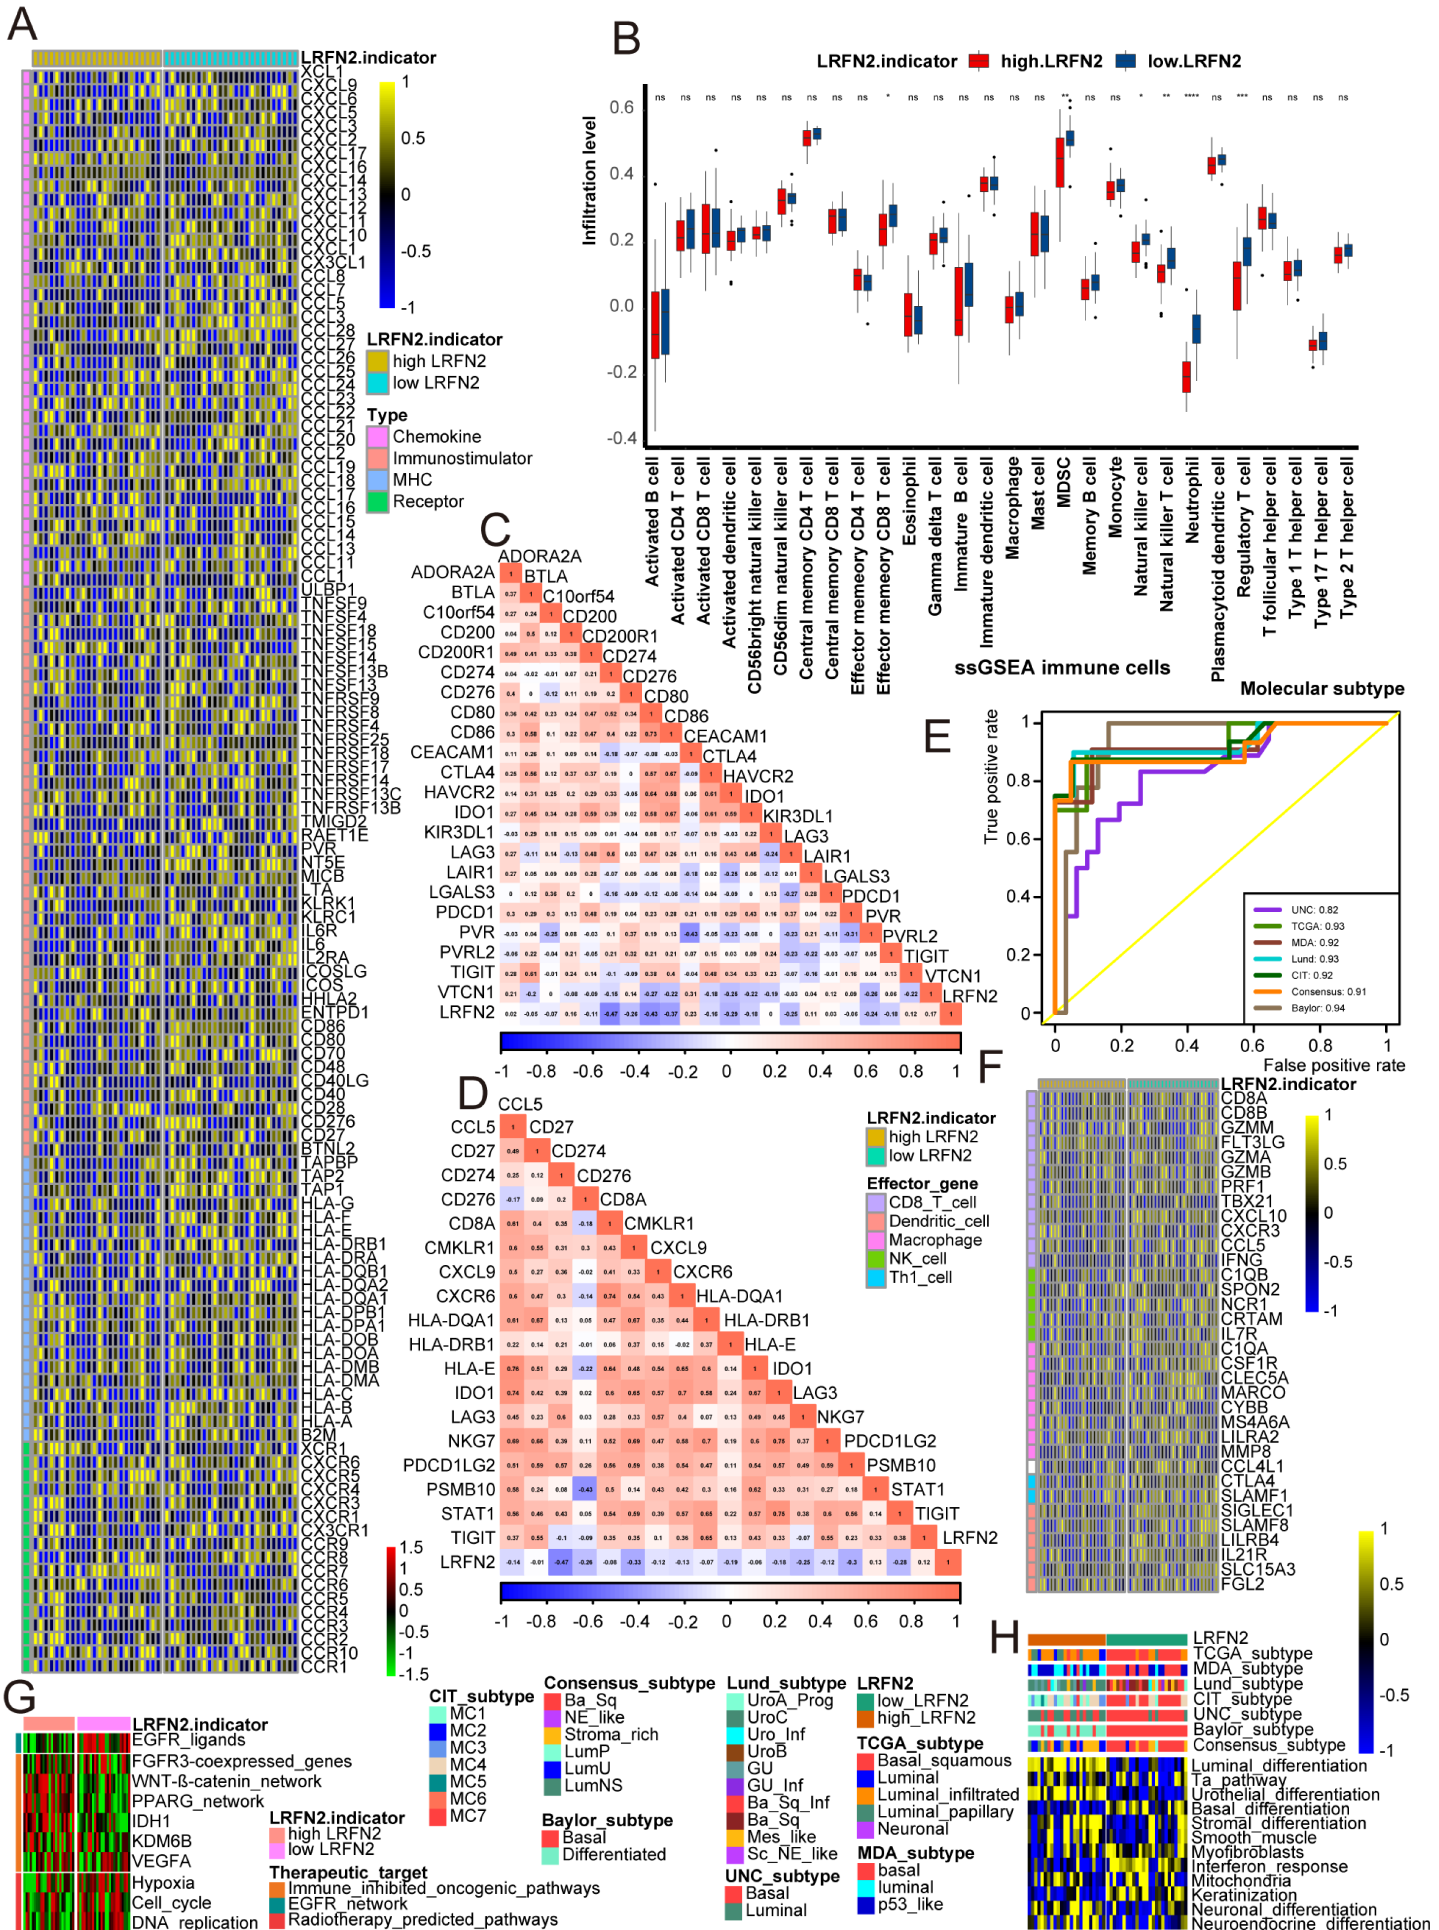

Supplement: jitc-2023-007230supp008.pdf [file jitc-2023-007230supp008.pdf]

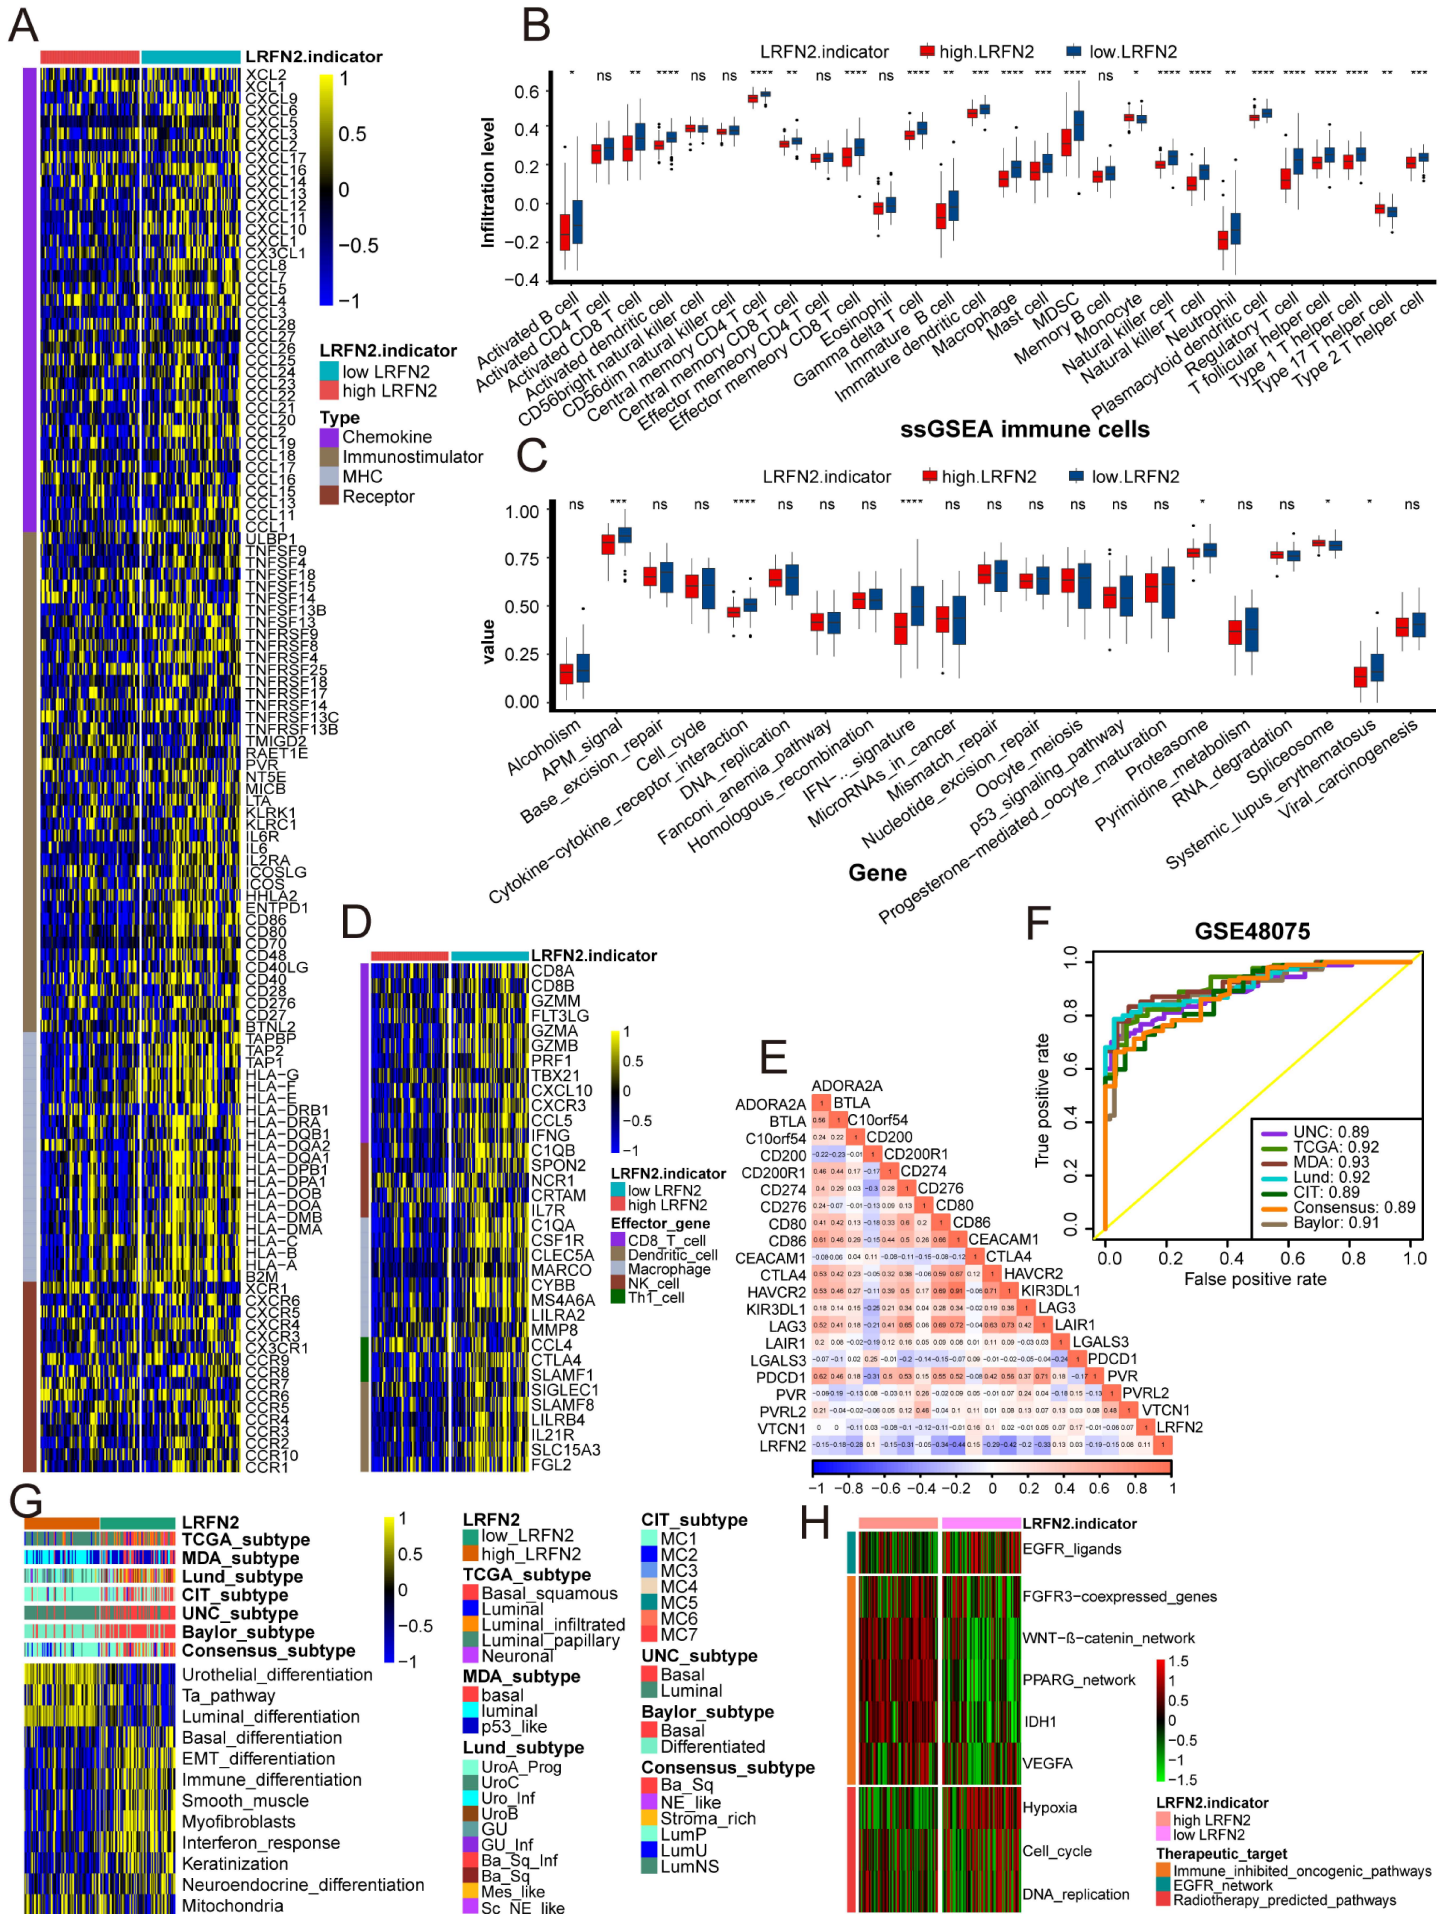

Supplement: jitc-2023-007230supp009.pdf [file jitc-2023-007230supp009.pdf]

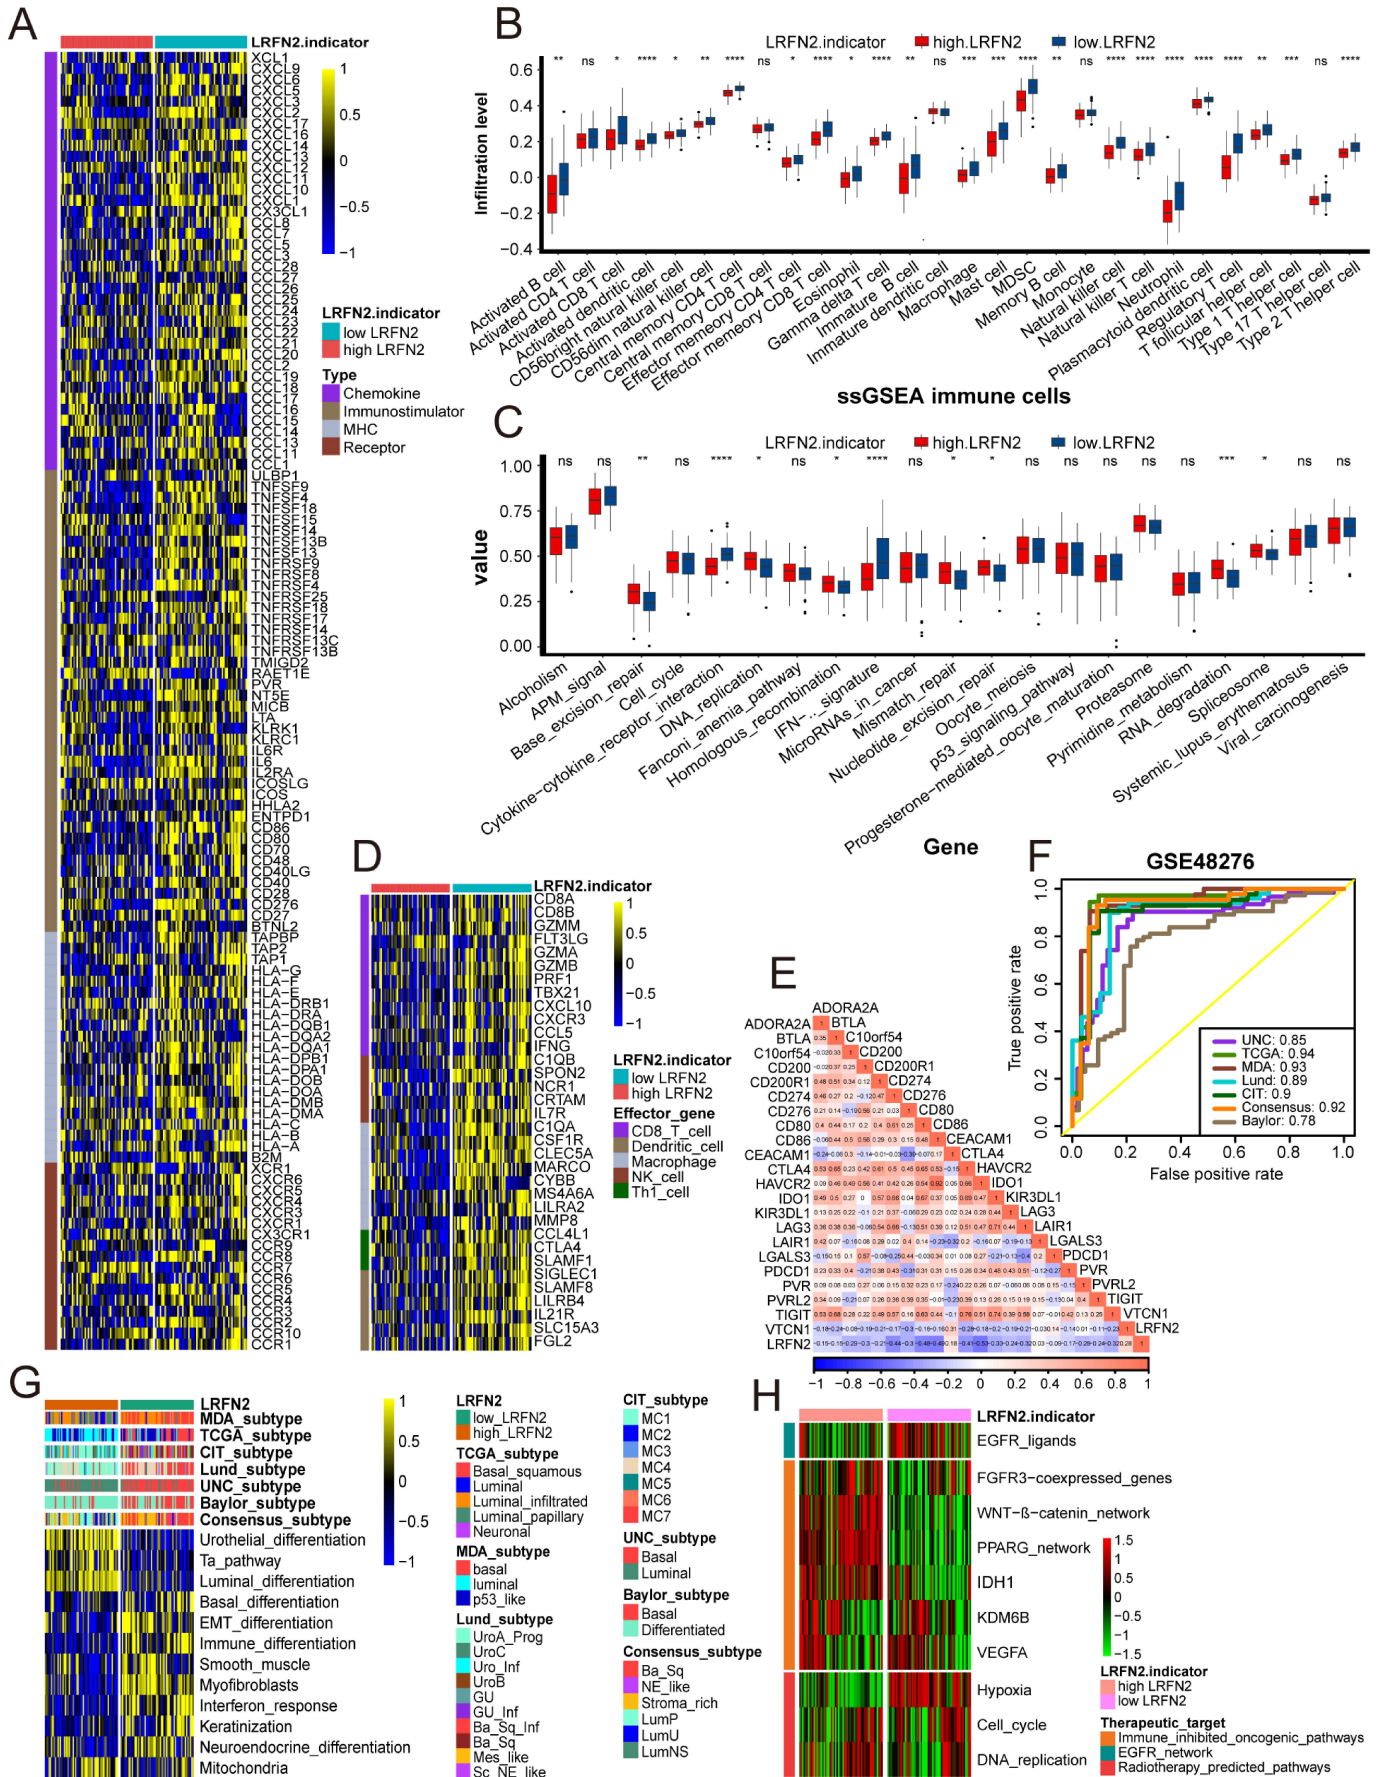

Supplement: jitc-2023-007230supp010.pdf [file jitc-2023-007230supp010.pdf]

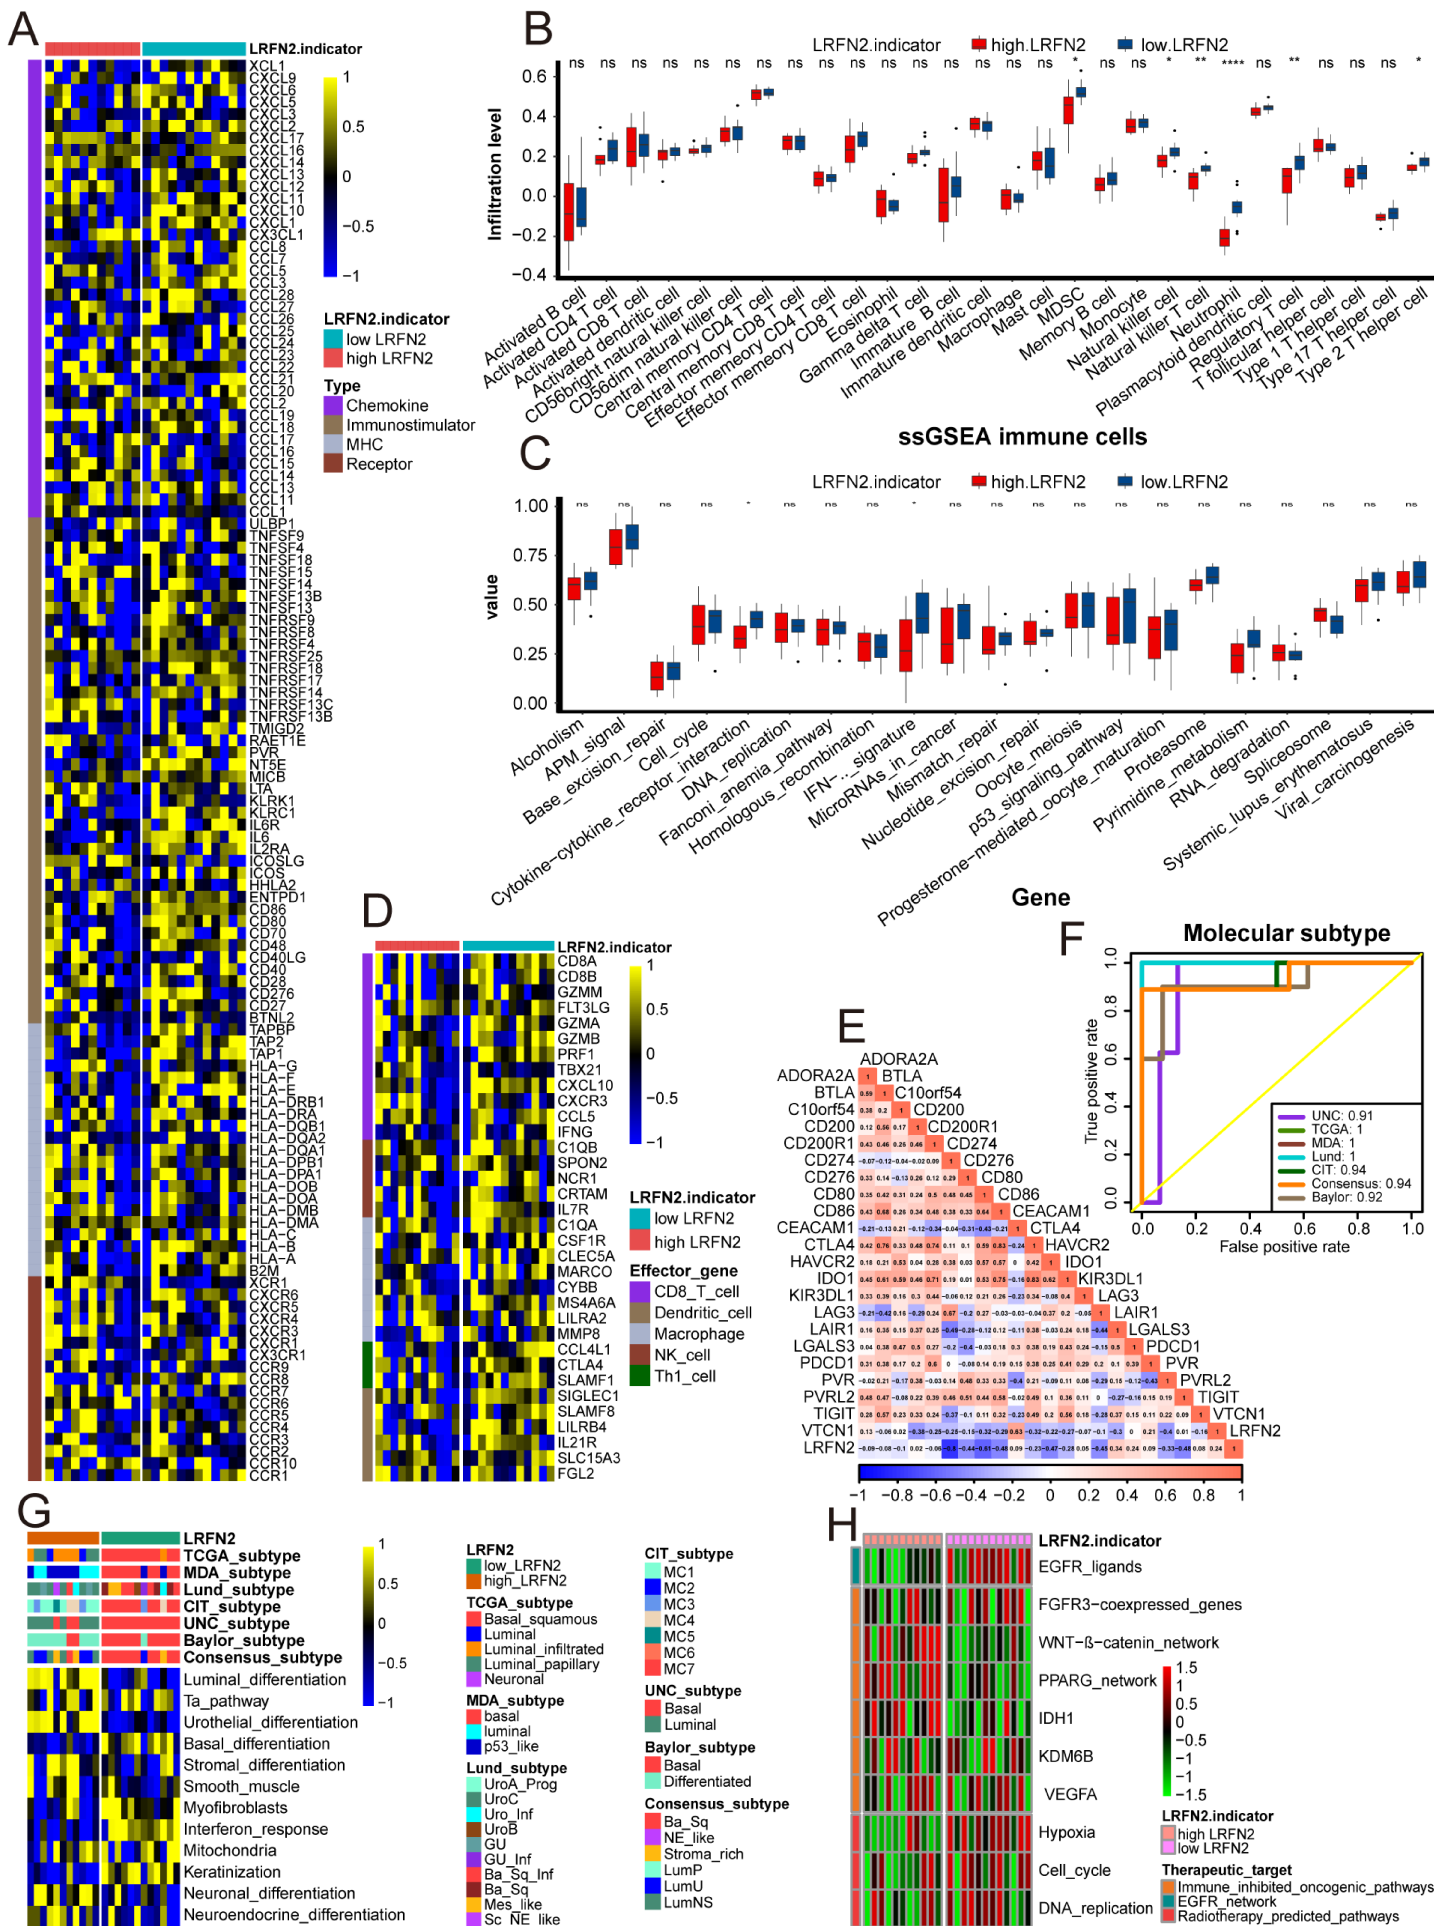

Supplement: jitc-2023-007230supp011.pdf [file jitc-2023-007230supp011.pdf]

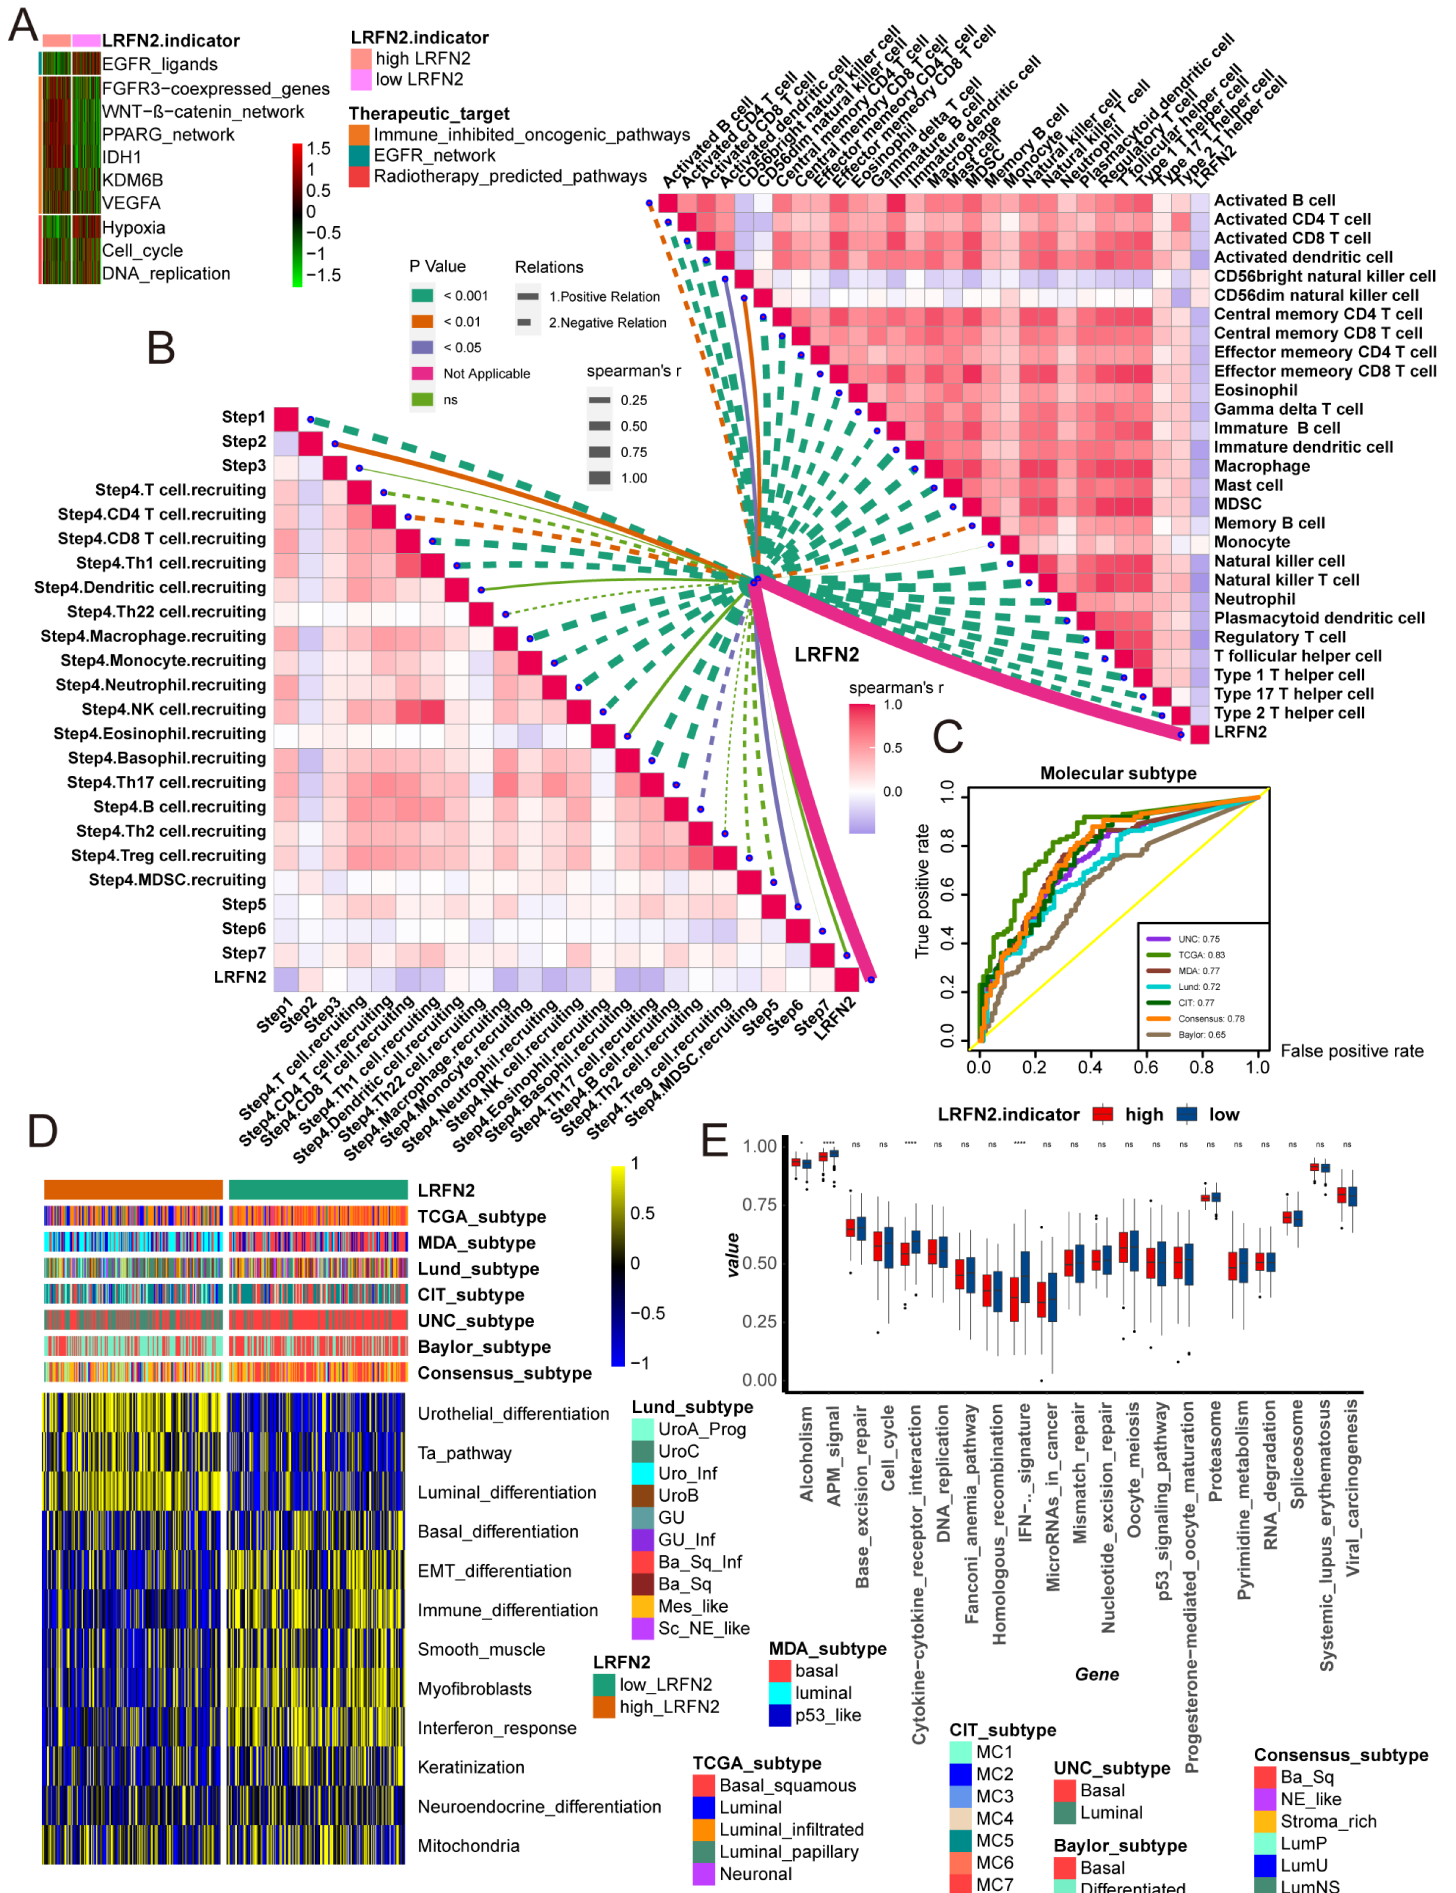

Supplement: jitc-2023-007230supp012.pdf [file jitc-2023-007230supp012.pdf]

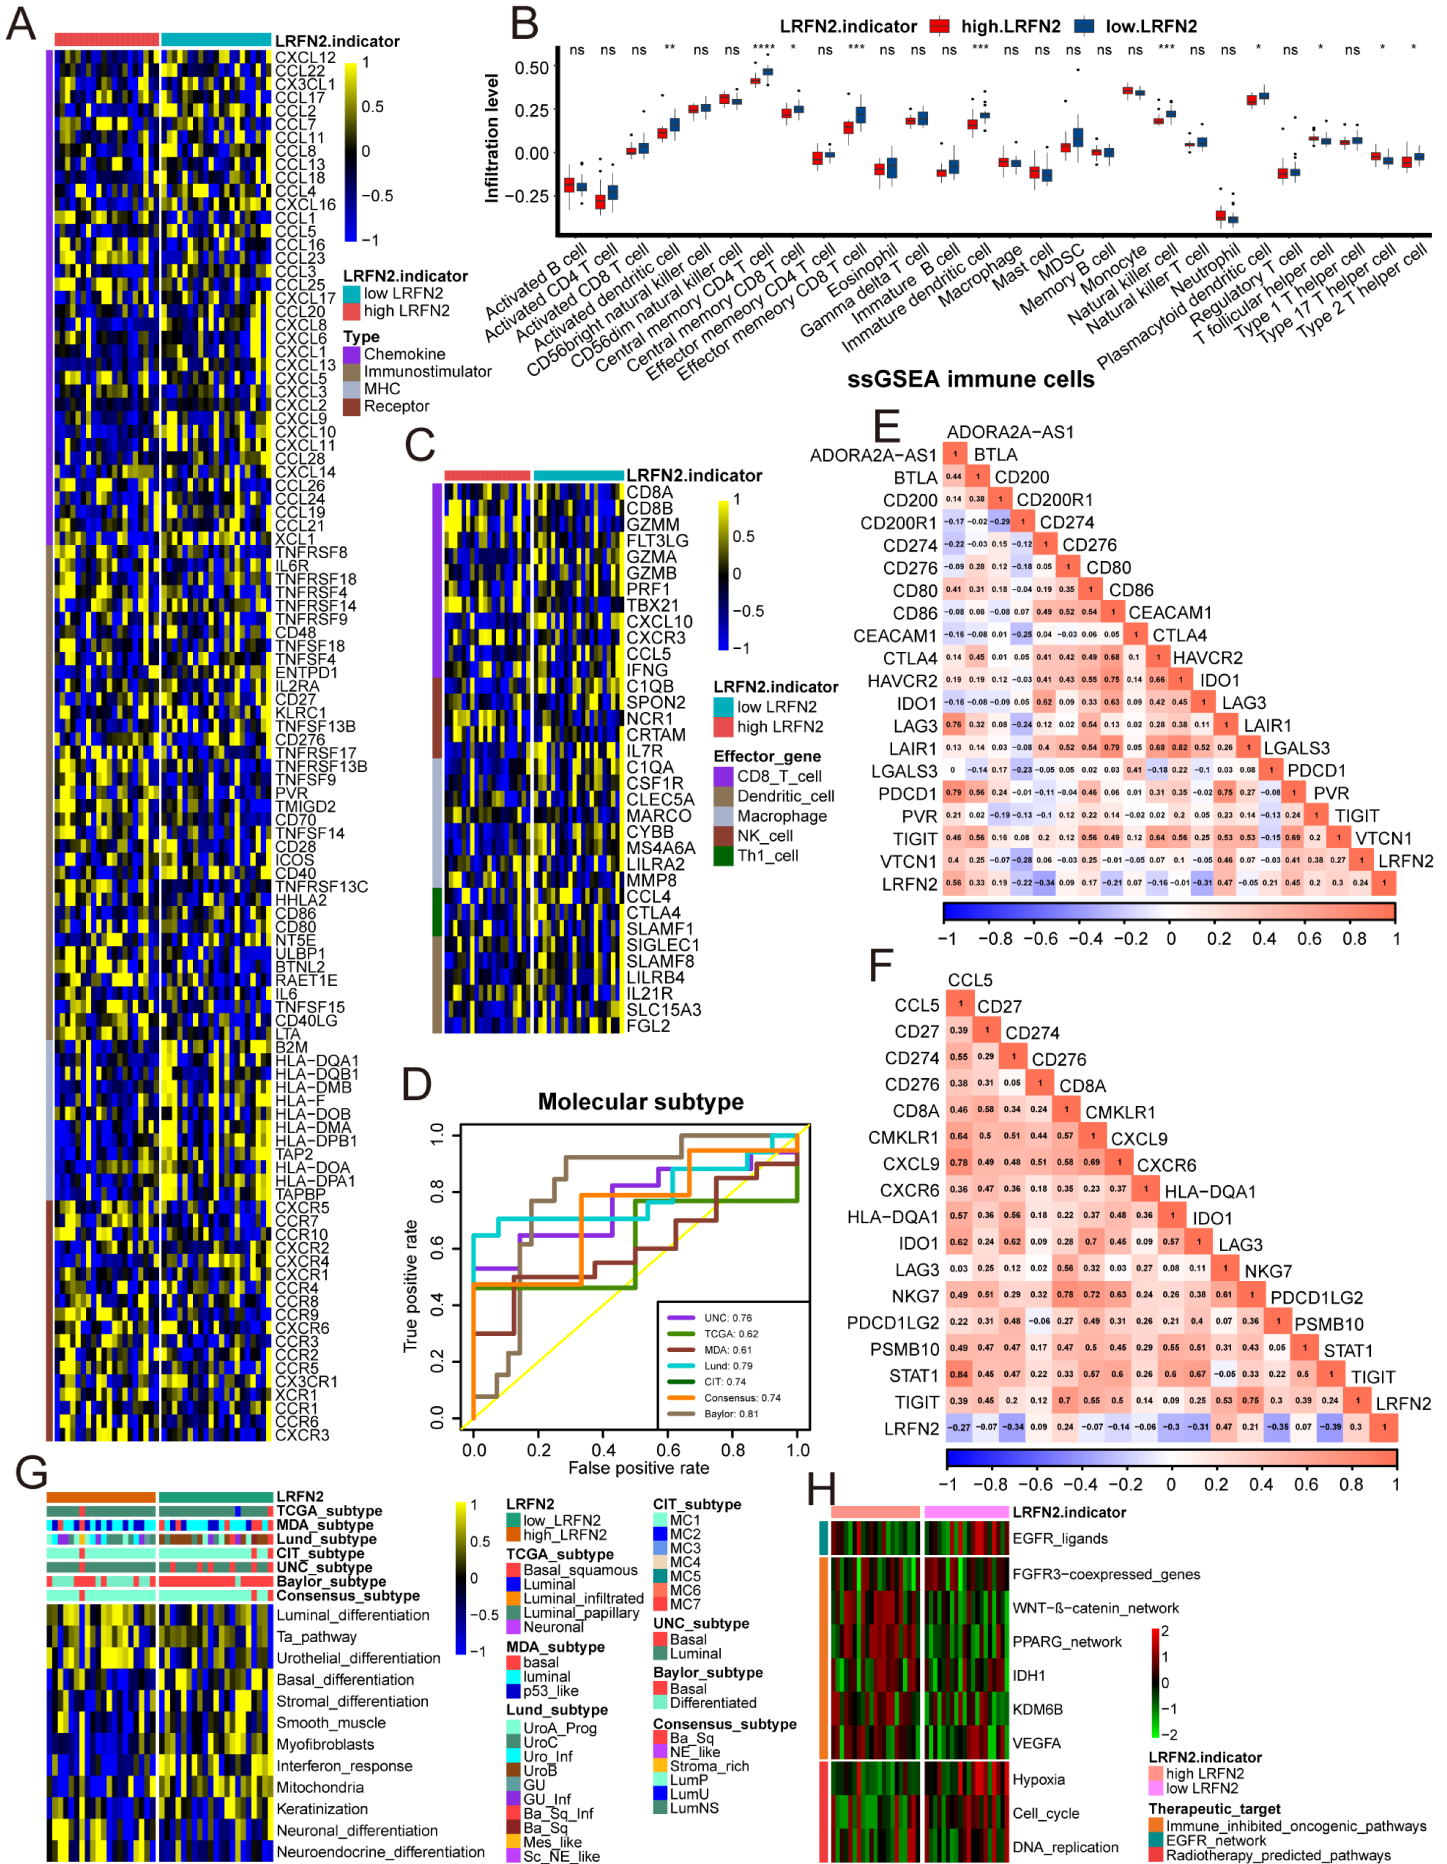

Supplement: jitc-2023-007230supp013.pdf [file jitc-2023-007230supp013.pdf]

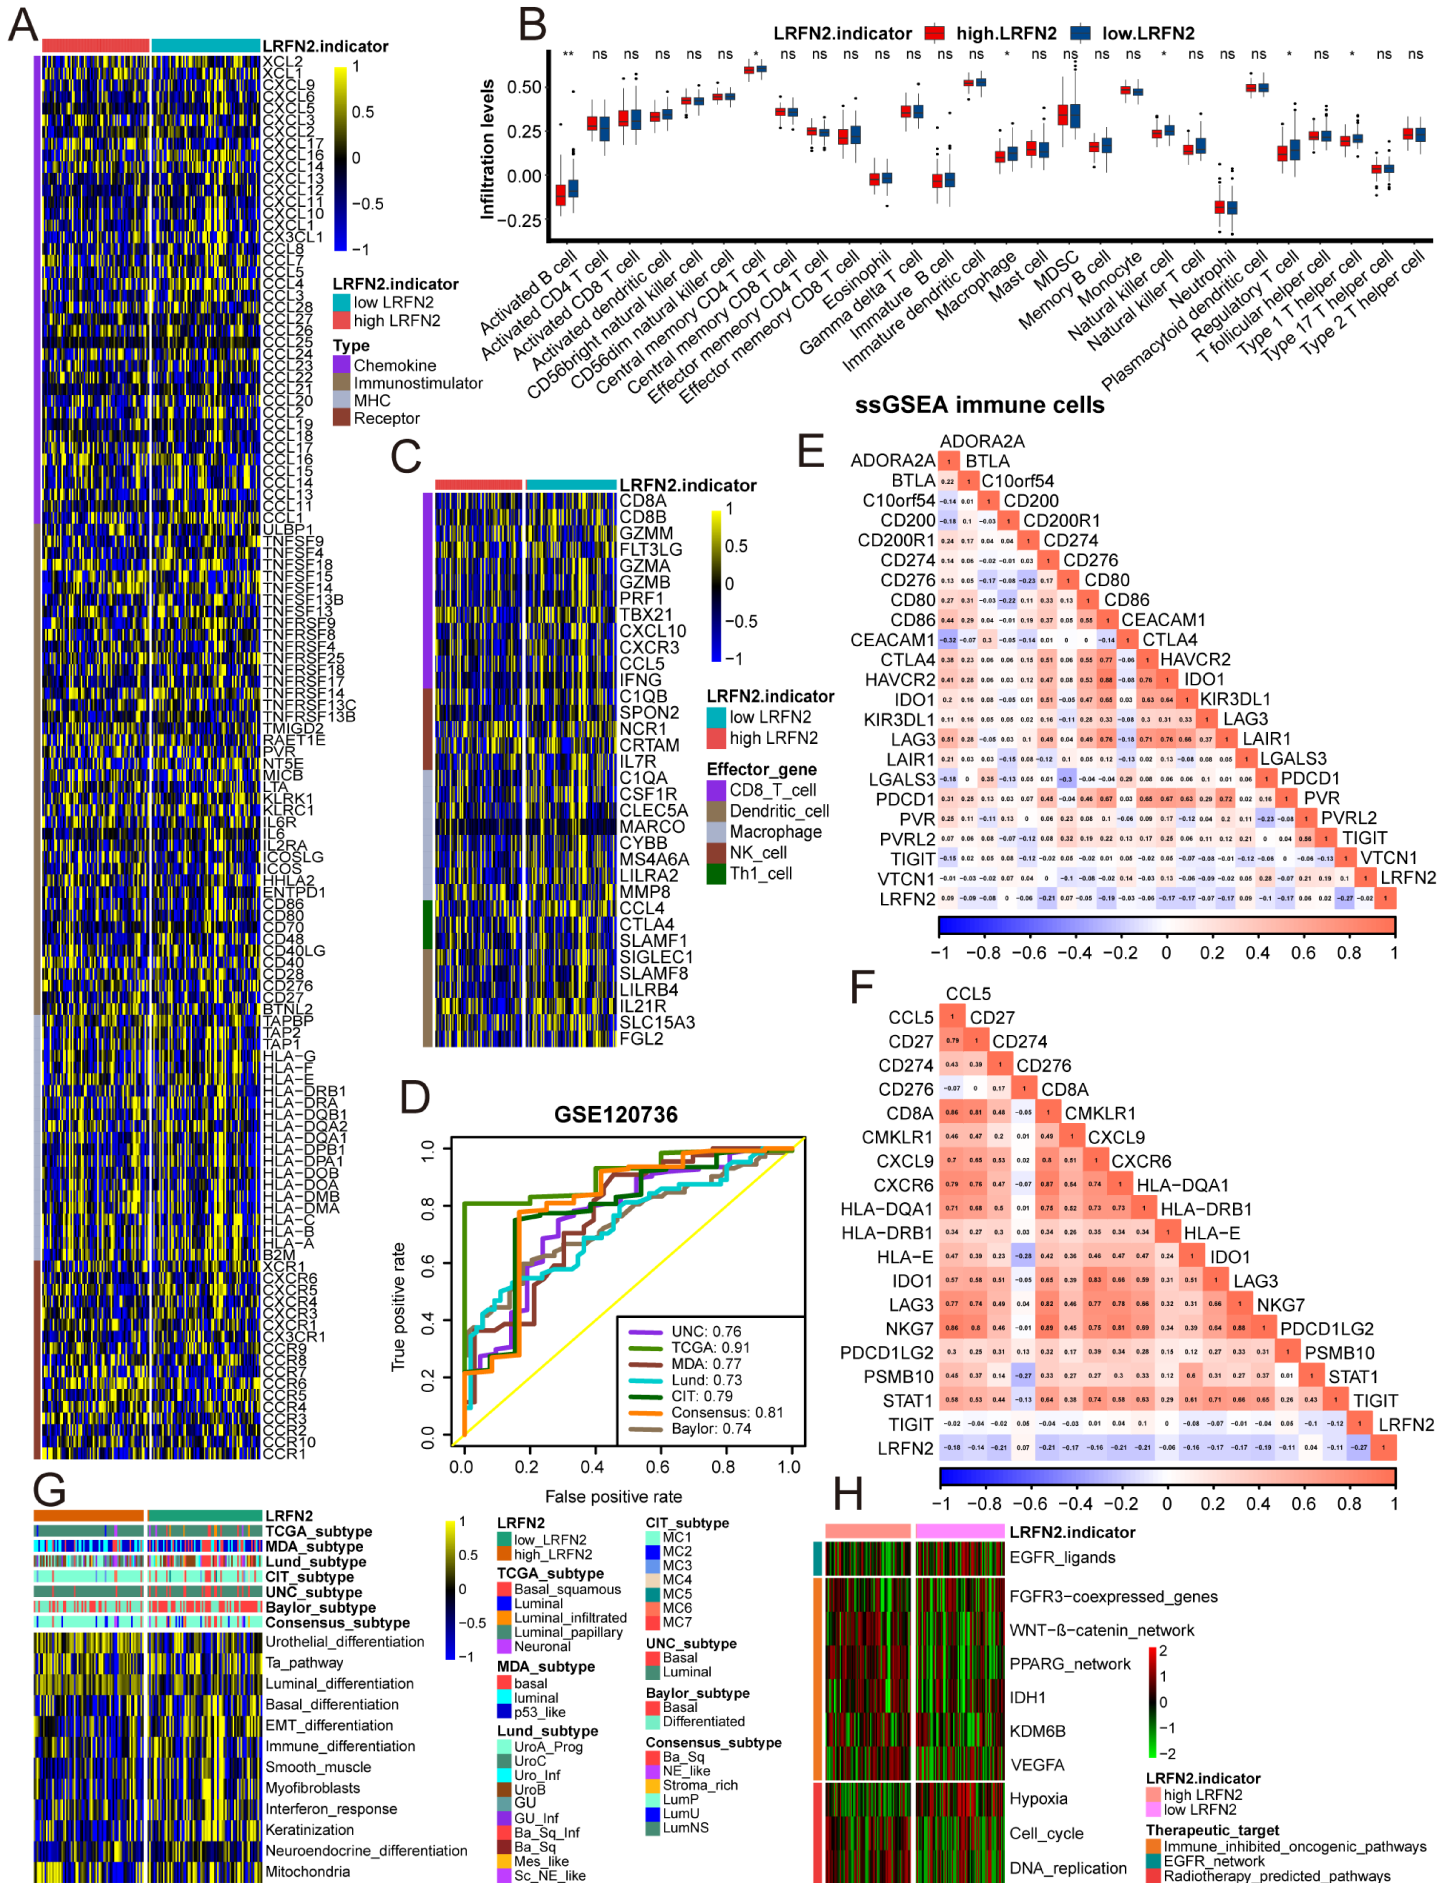

Supplement: jitc-2023-007230supp014.pdf [file jitc-2023-007230supp014.pdf]

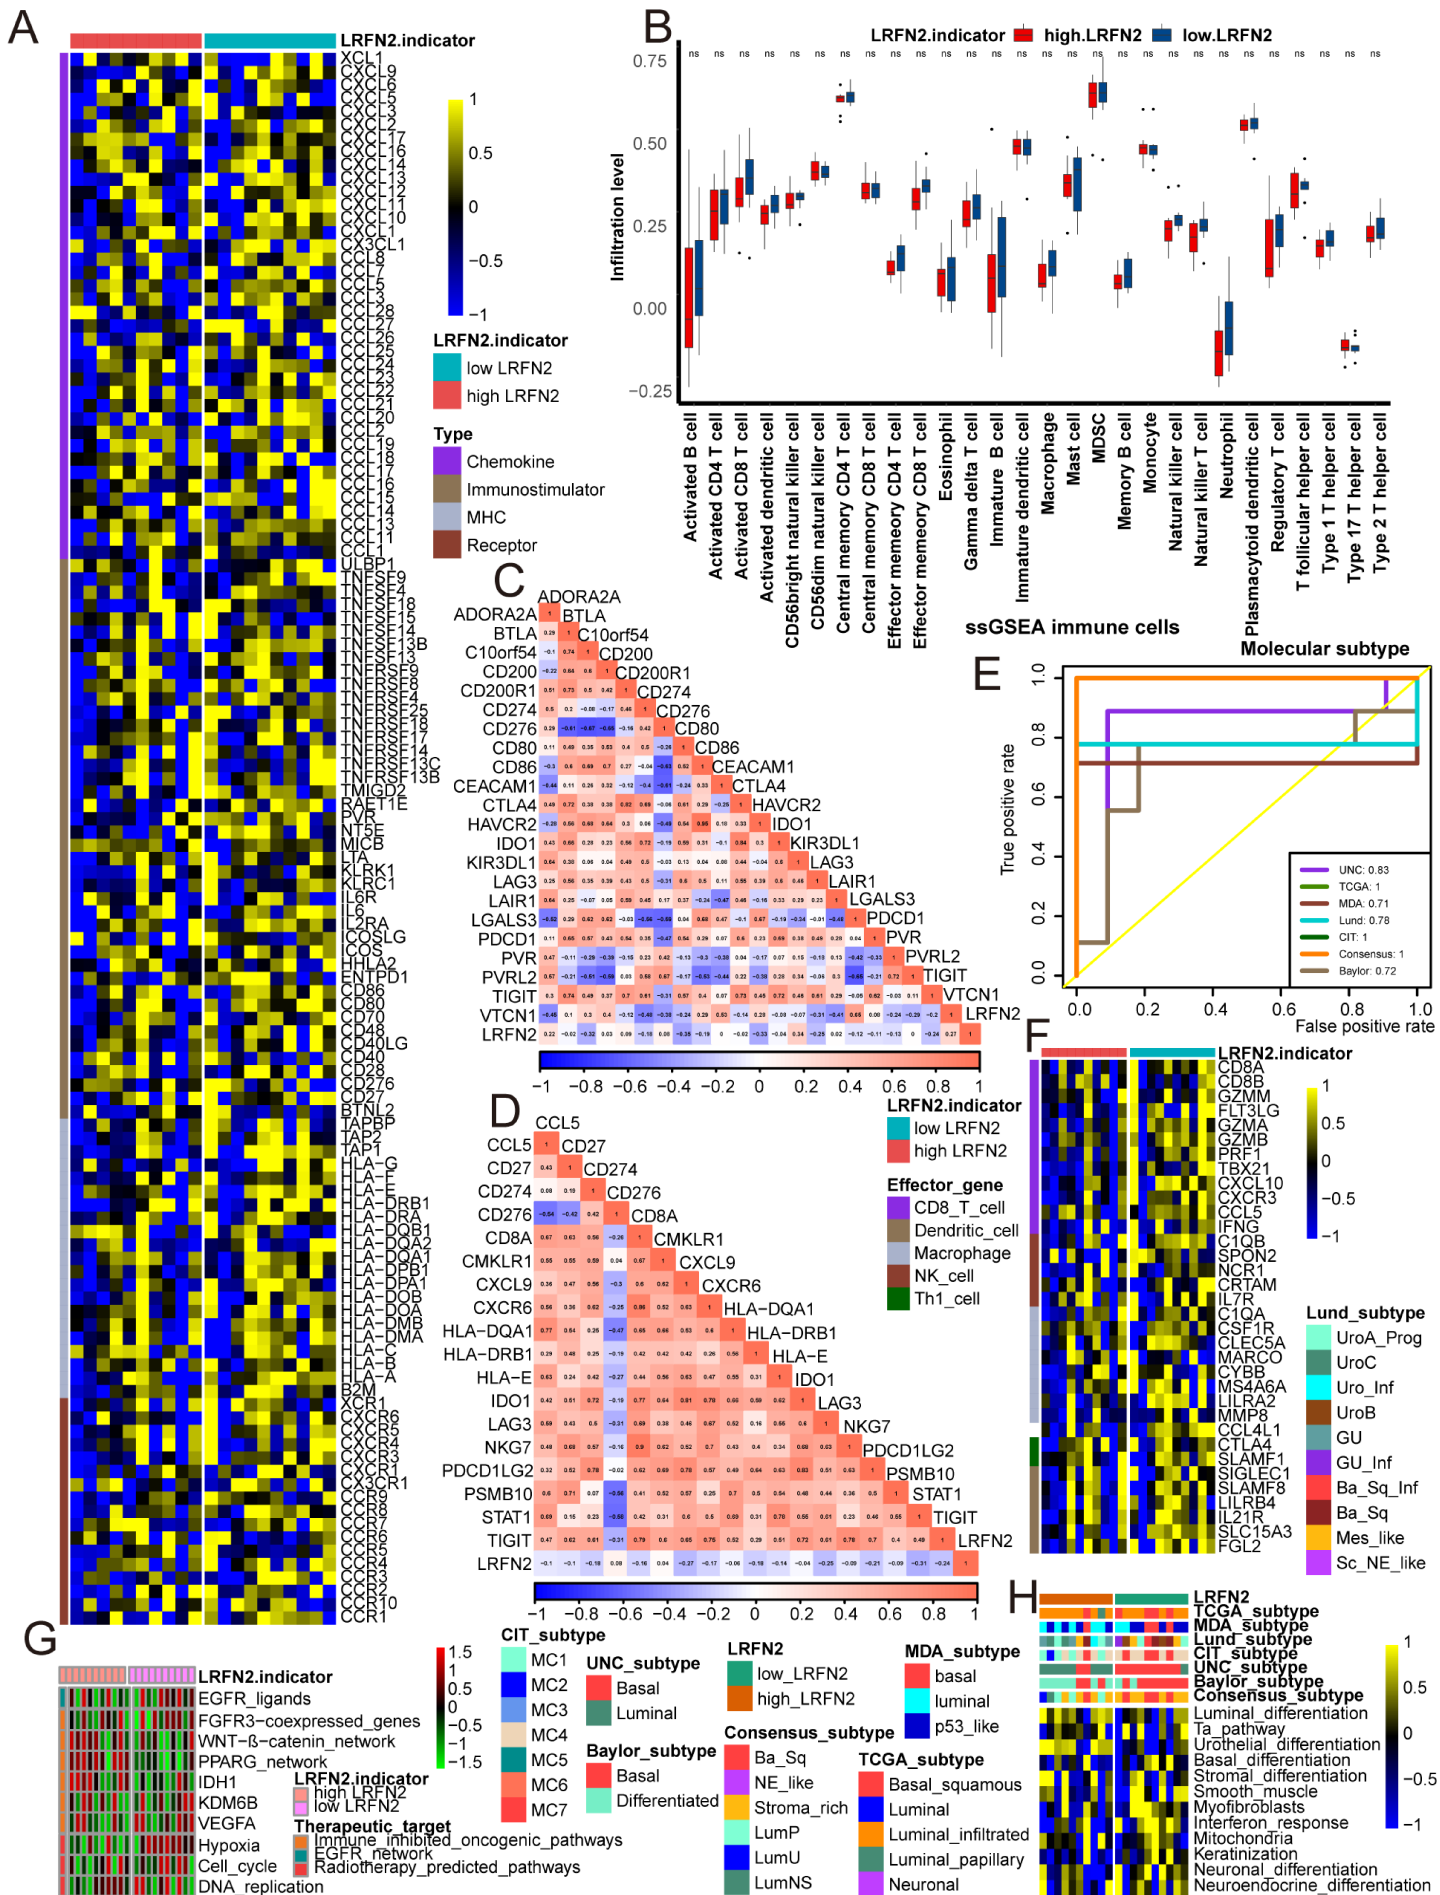

Supplement: jitc-2023-007230supp015.pdf [file jitc-2023-007230supp015.pdf]

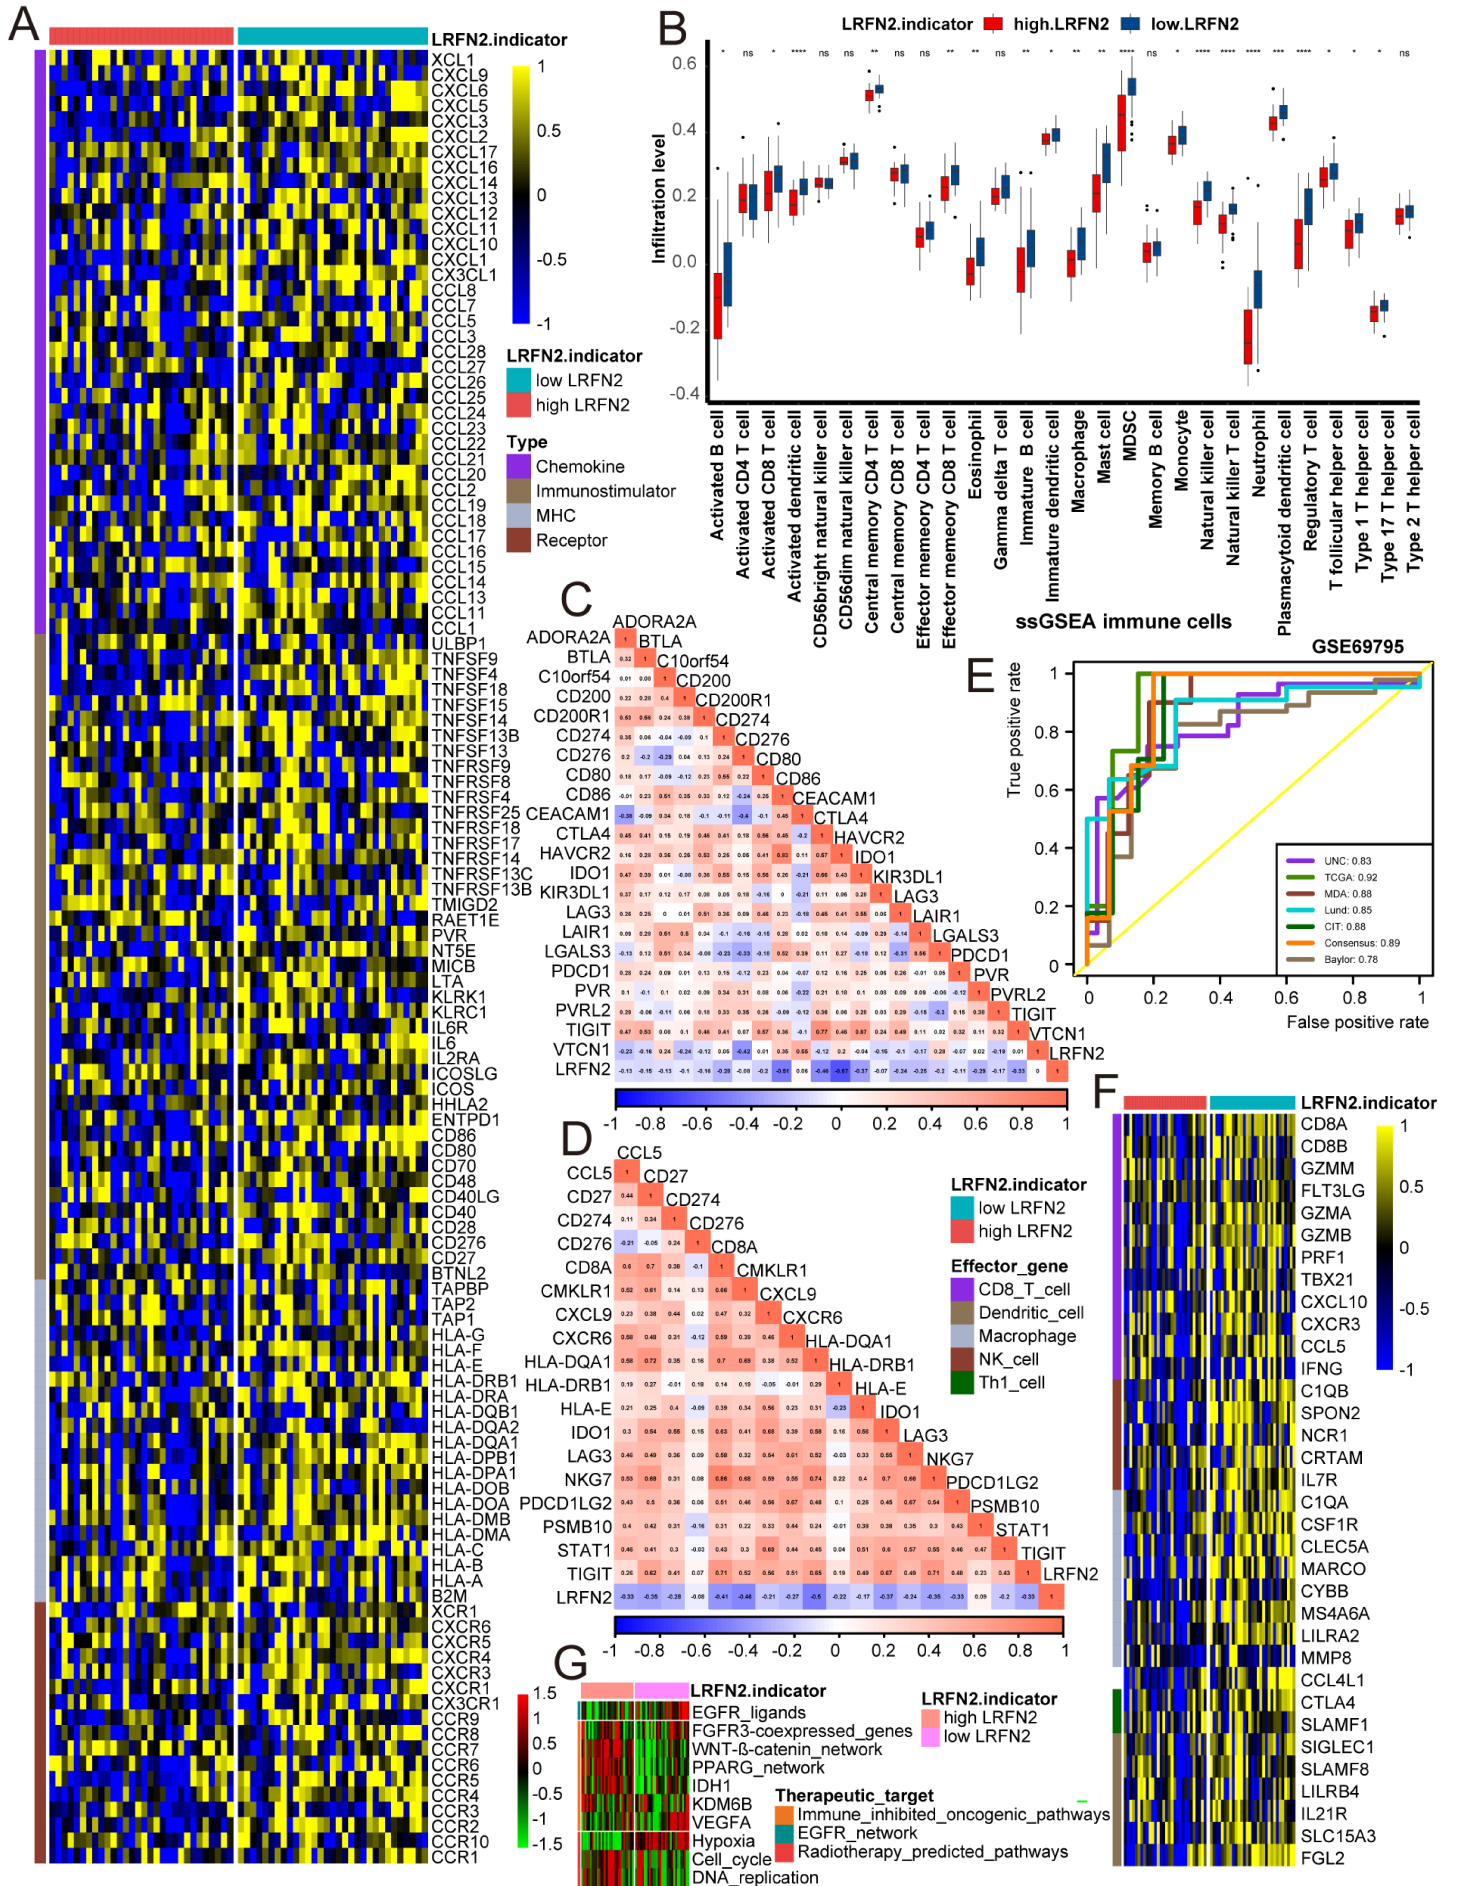

Supplement: jitc-2023-007230supp016.pdf [file jitc-2023-007230supp016.pdf]

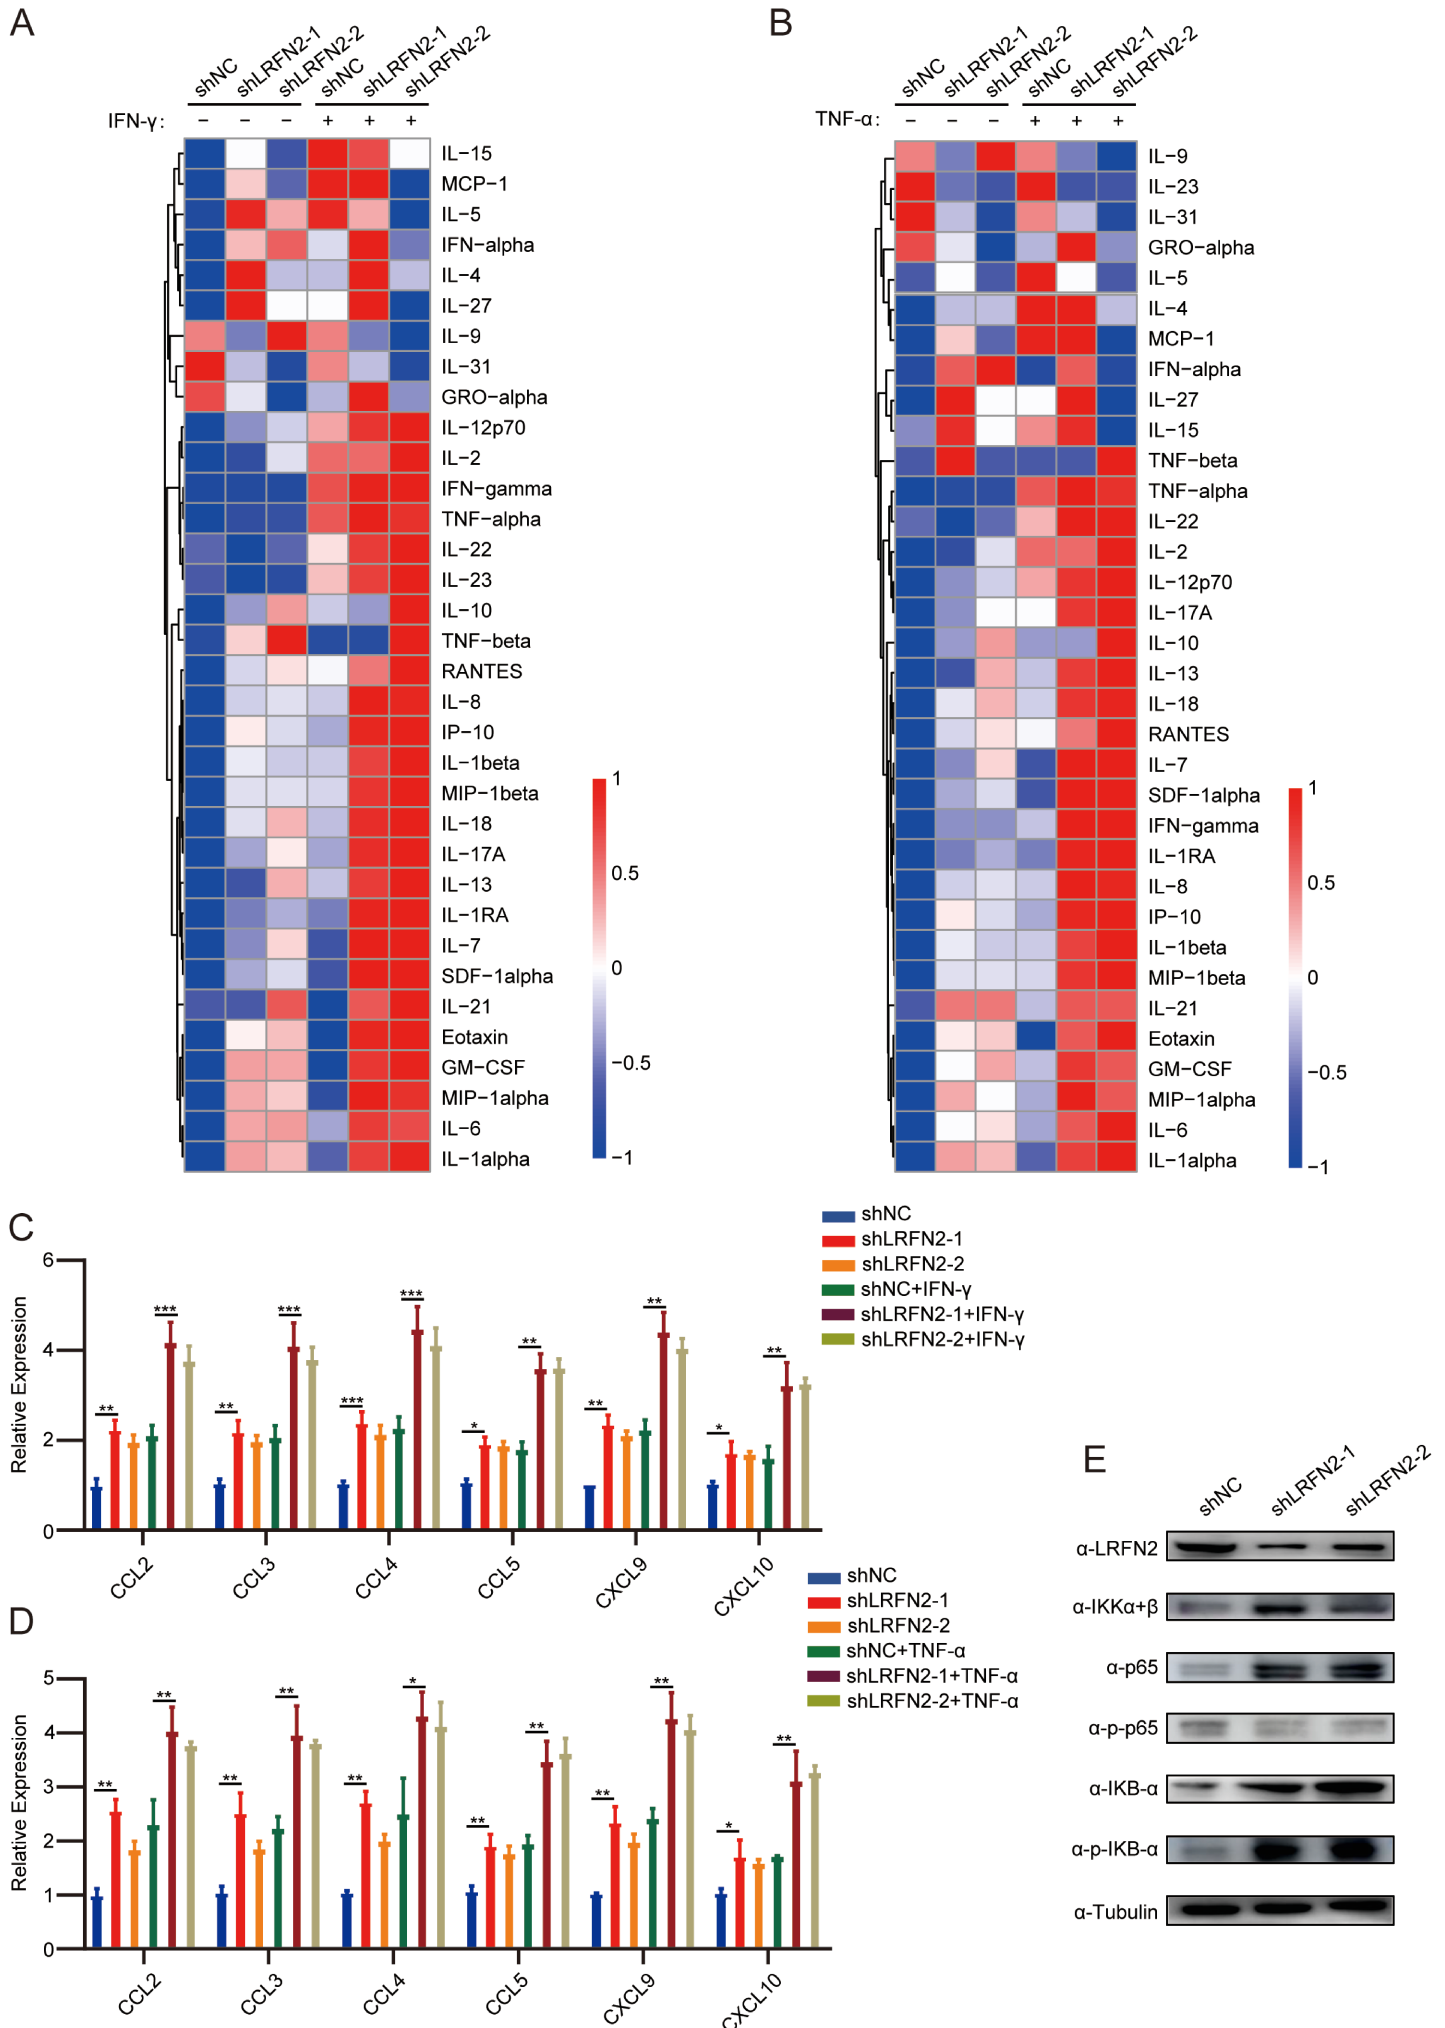

Supplement: jitc-2023-007230supp017.pdf [file jitc-2023-007230supp017.pdf]

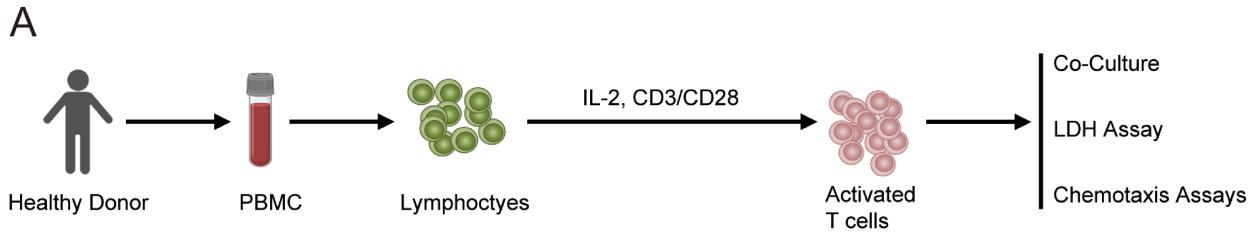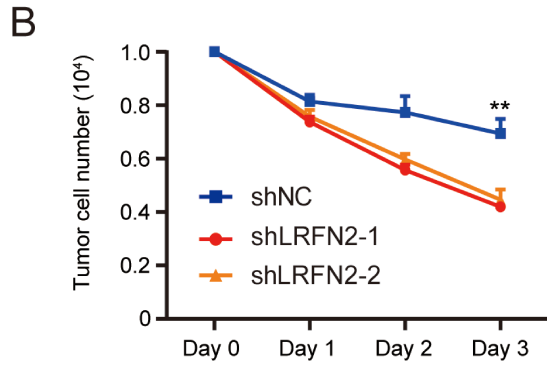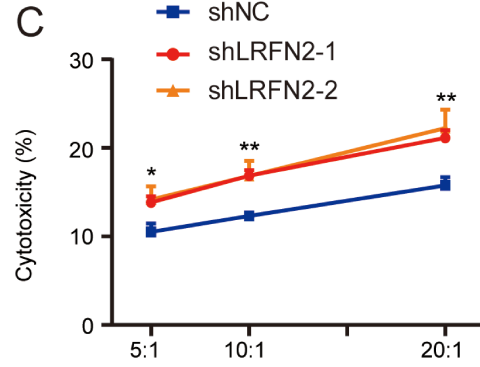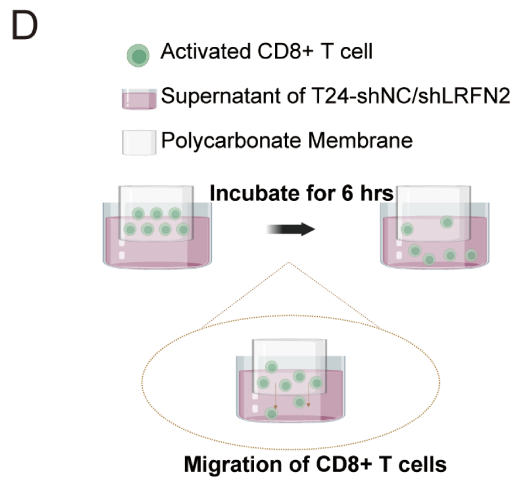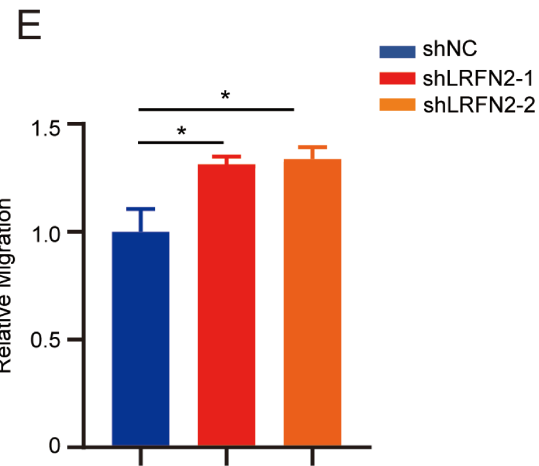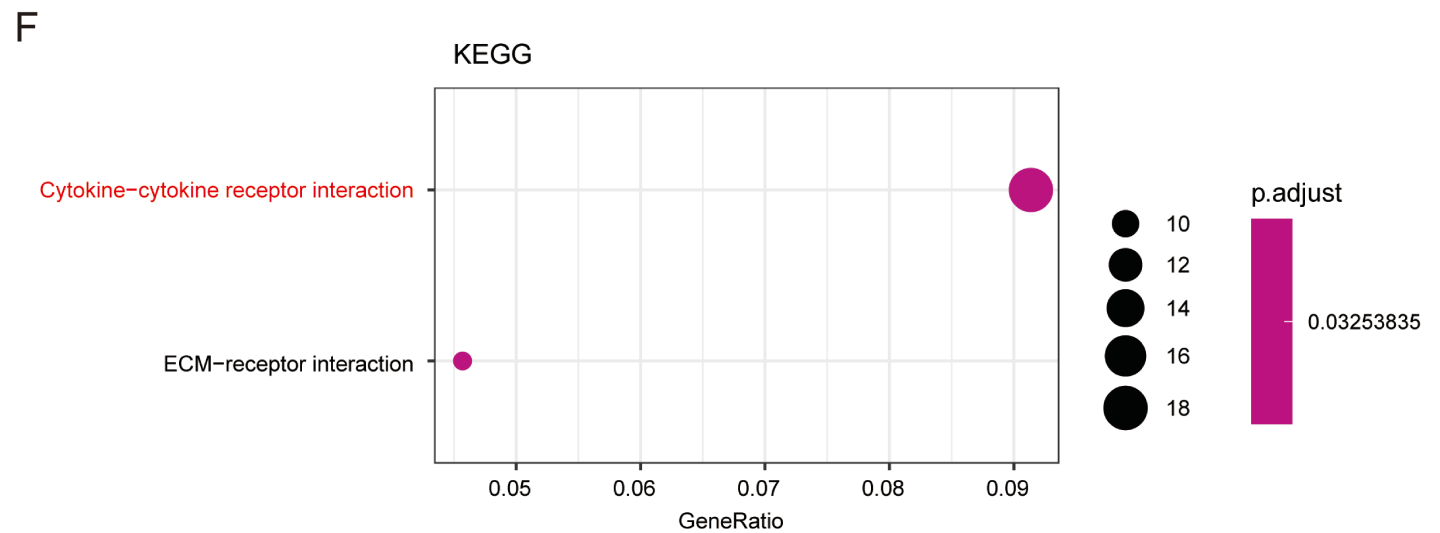

Supplement: jitc-2023-007230supp018.pdf [file jitc-2023-007230supp018.pdf]

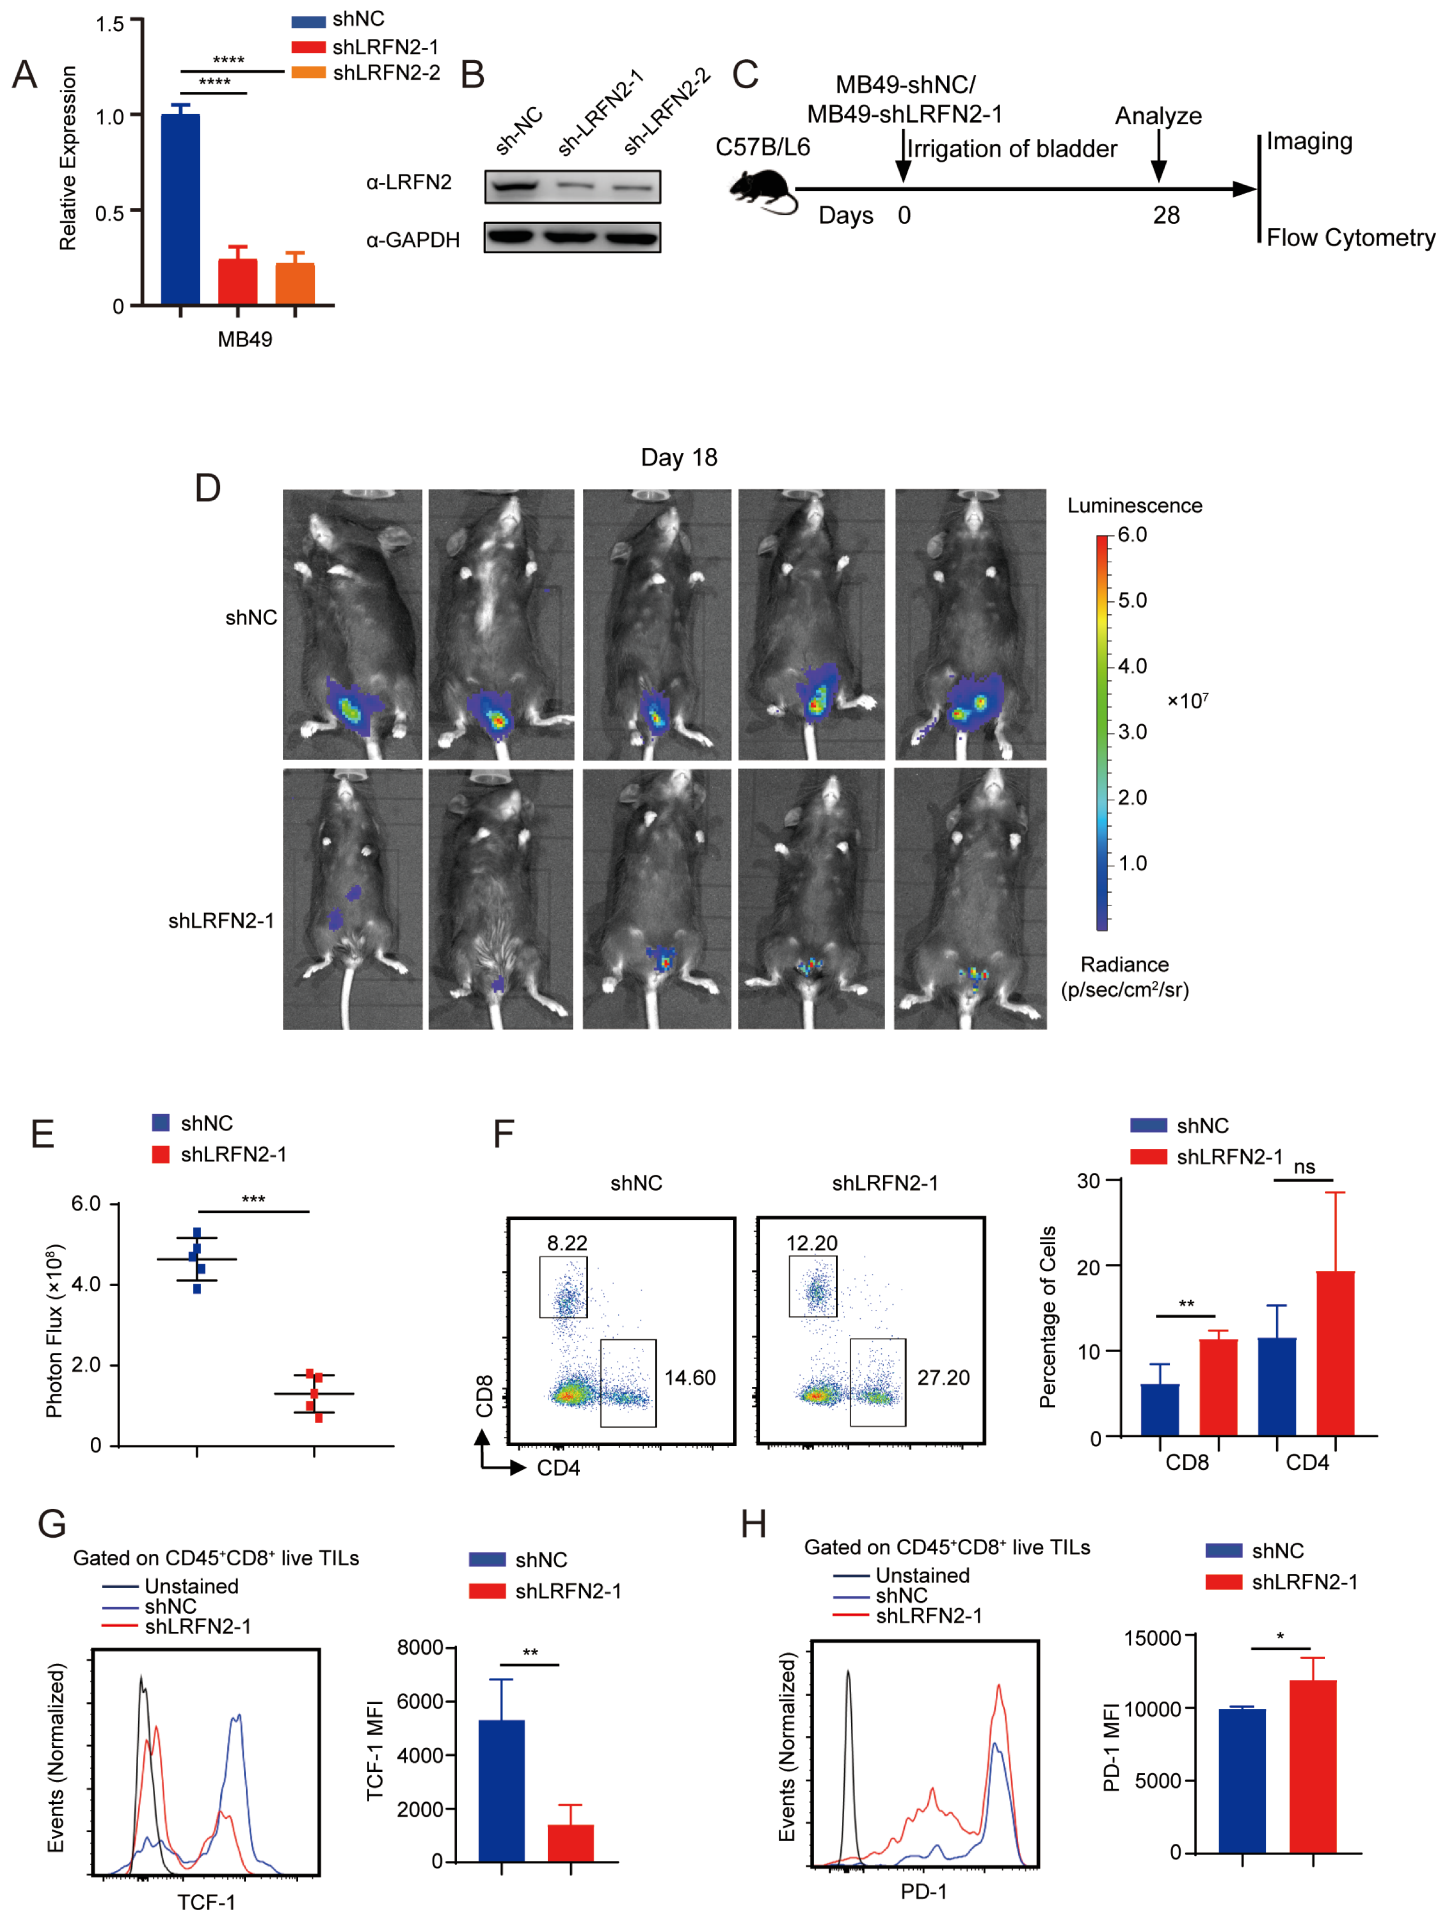

Supplement: jitc-2023-007230supp020.pdf [file jitc-2023-007230supp020.pdf]

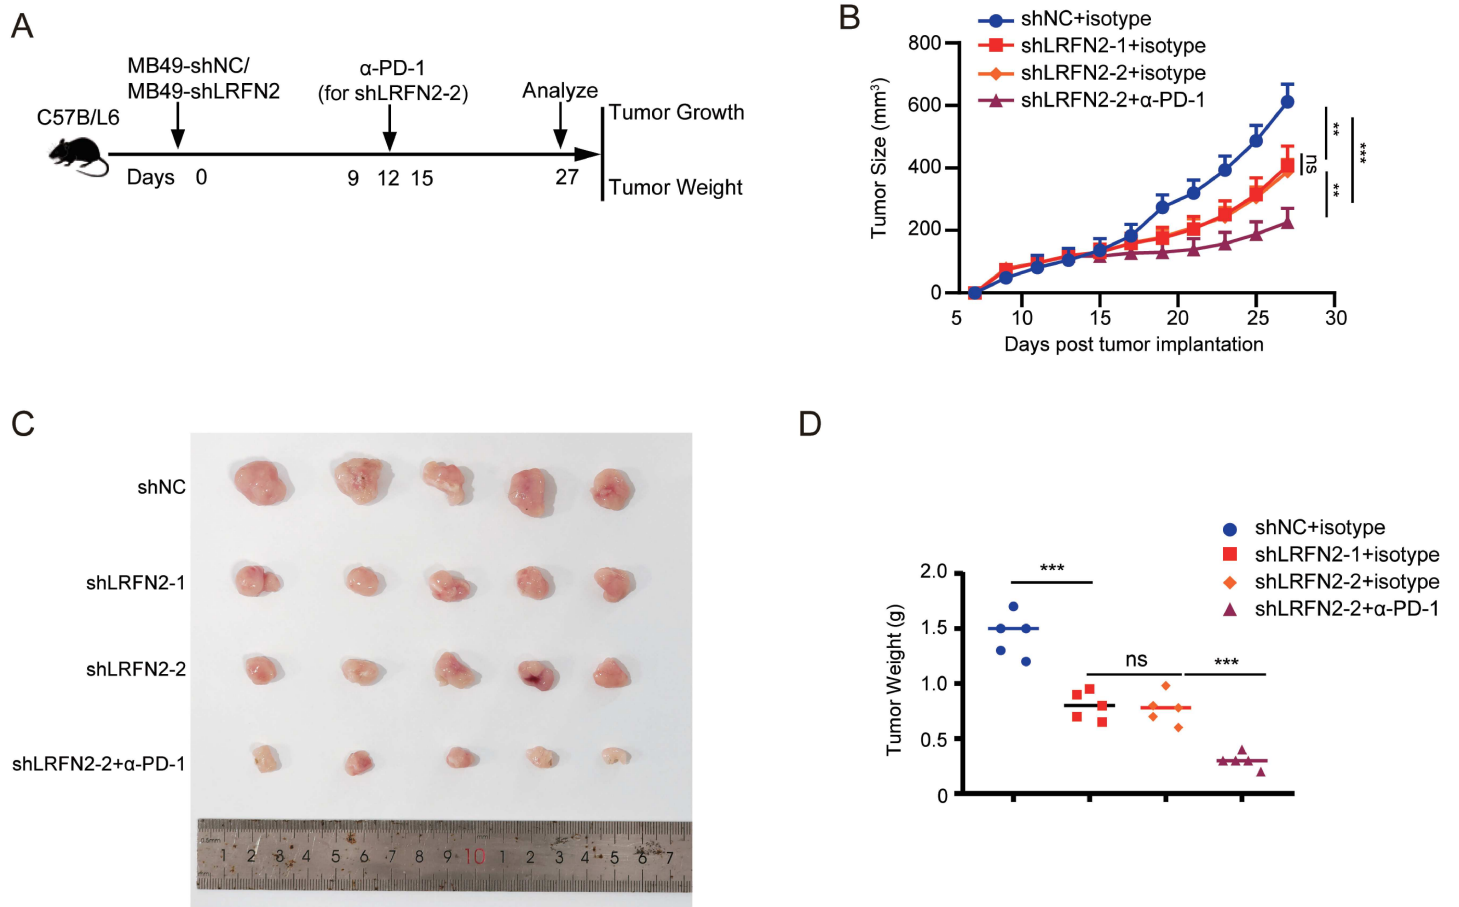

Supplement: jitc-2023-007230supp021.pdf [file jitc-2023-007230supp021.pdf]

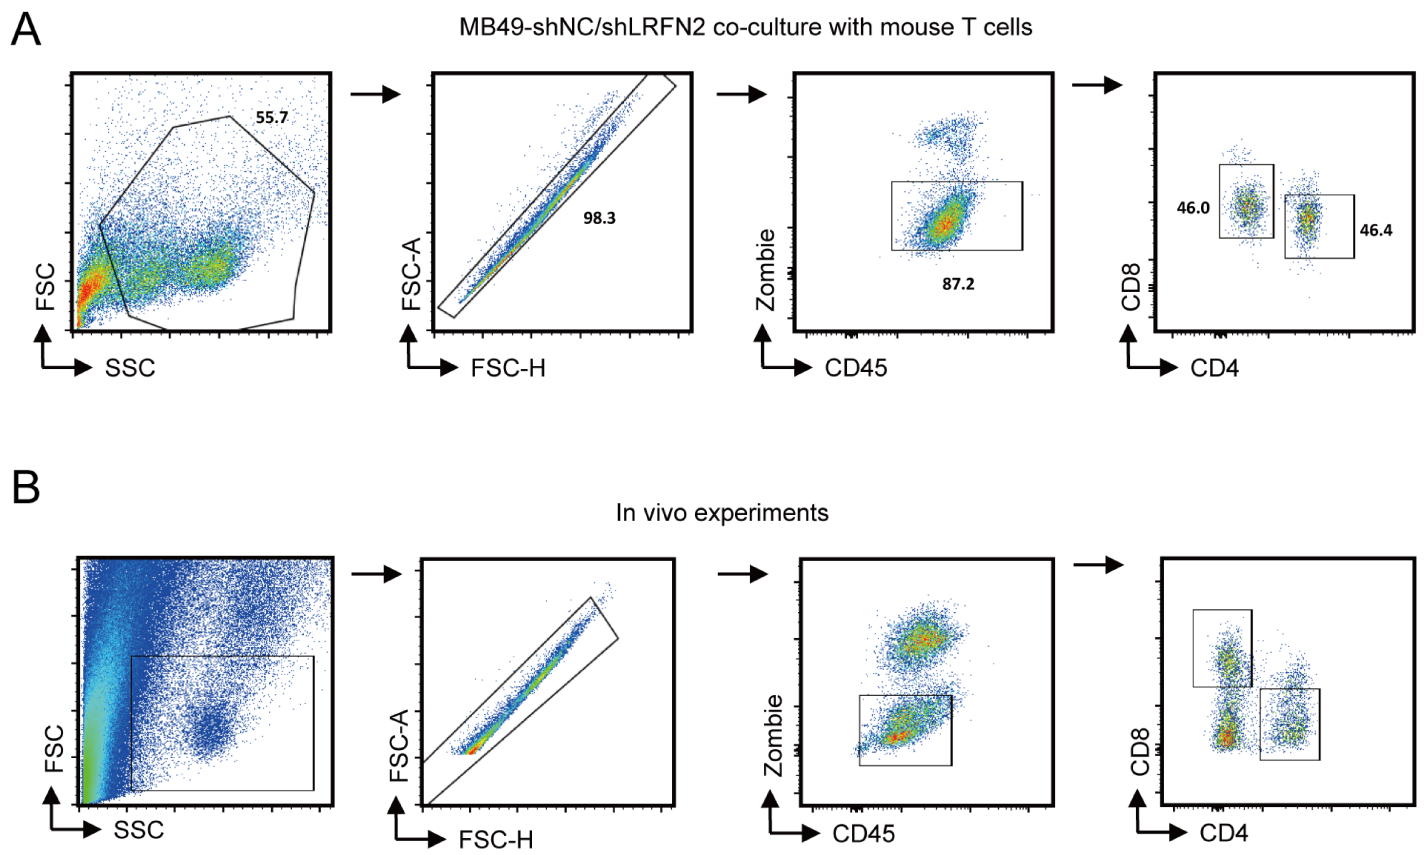

Supplement: jitc-2023-007230supp022.pdf [file jitc-2023-007230supp022.pdf]

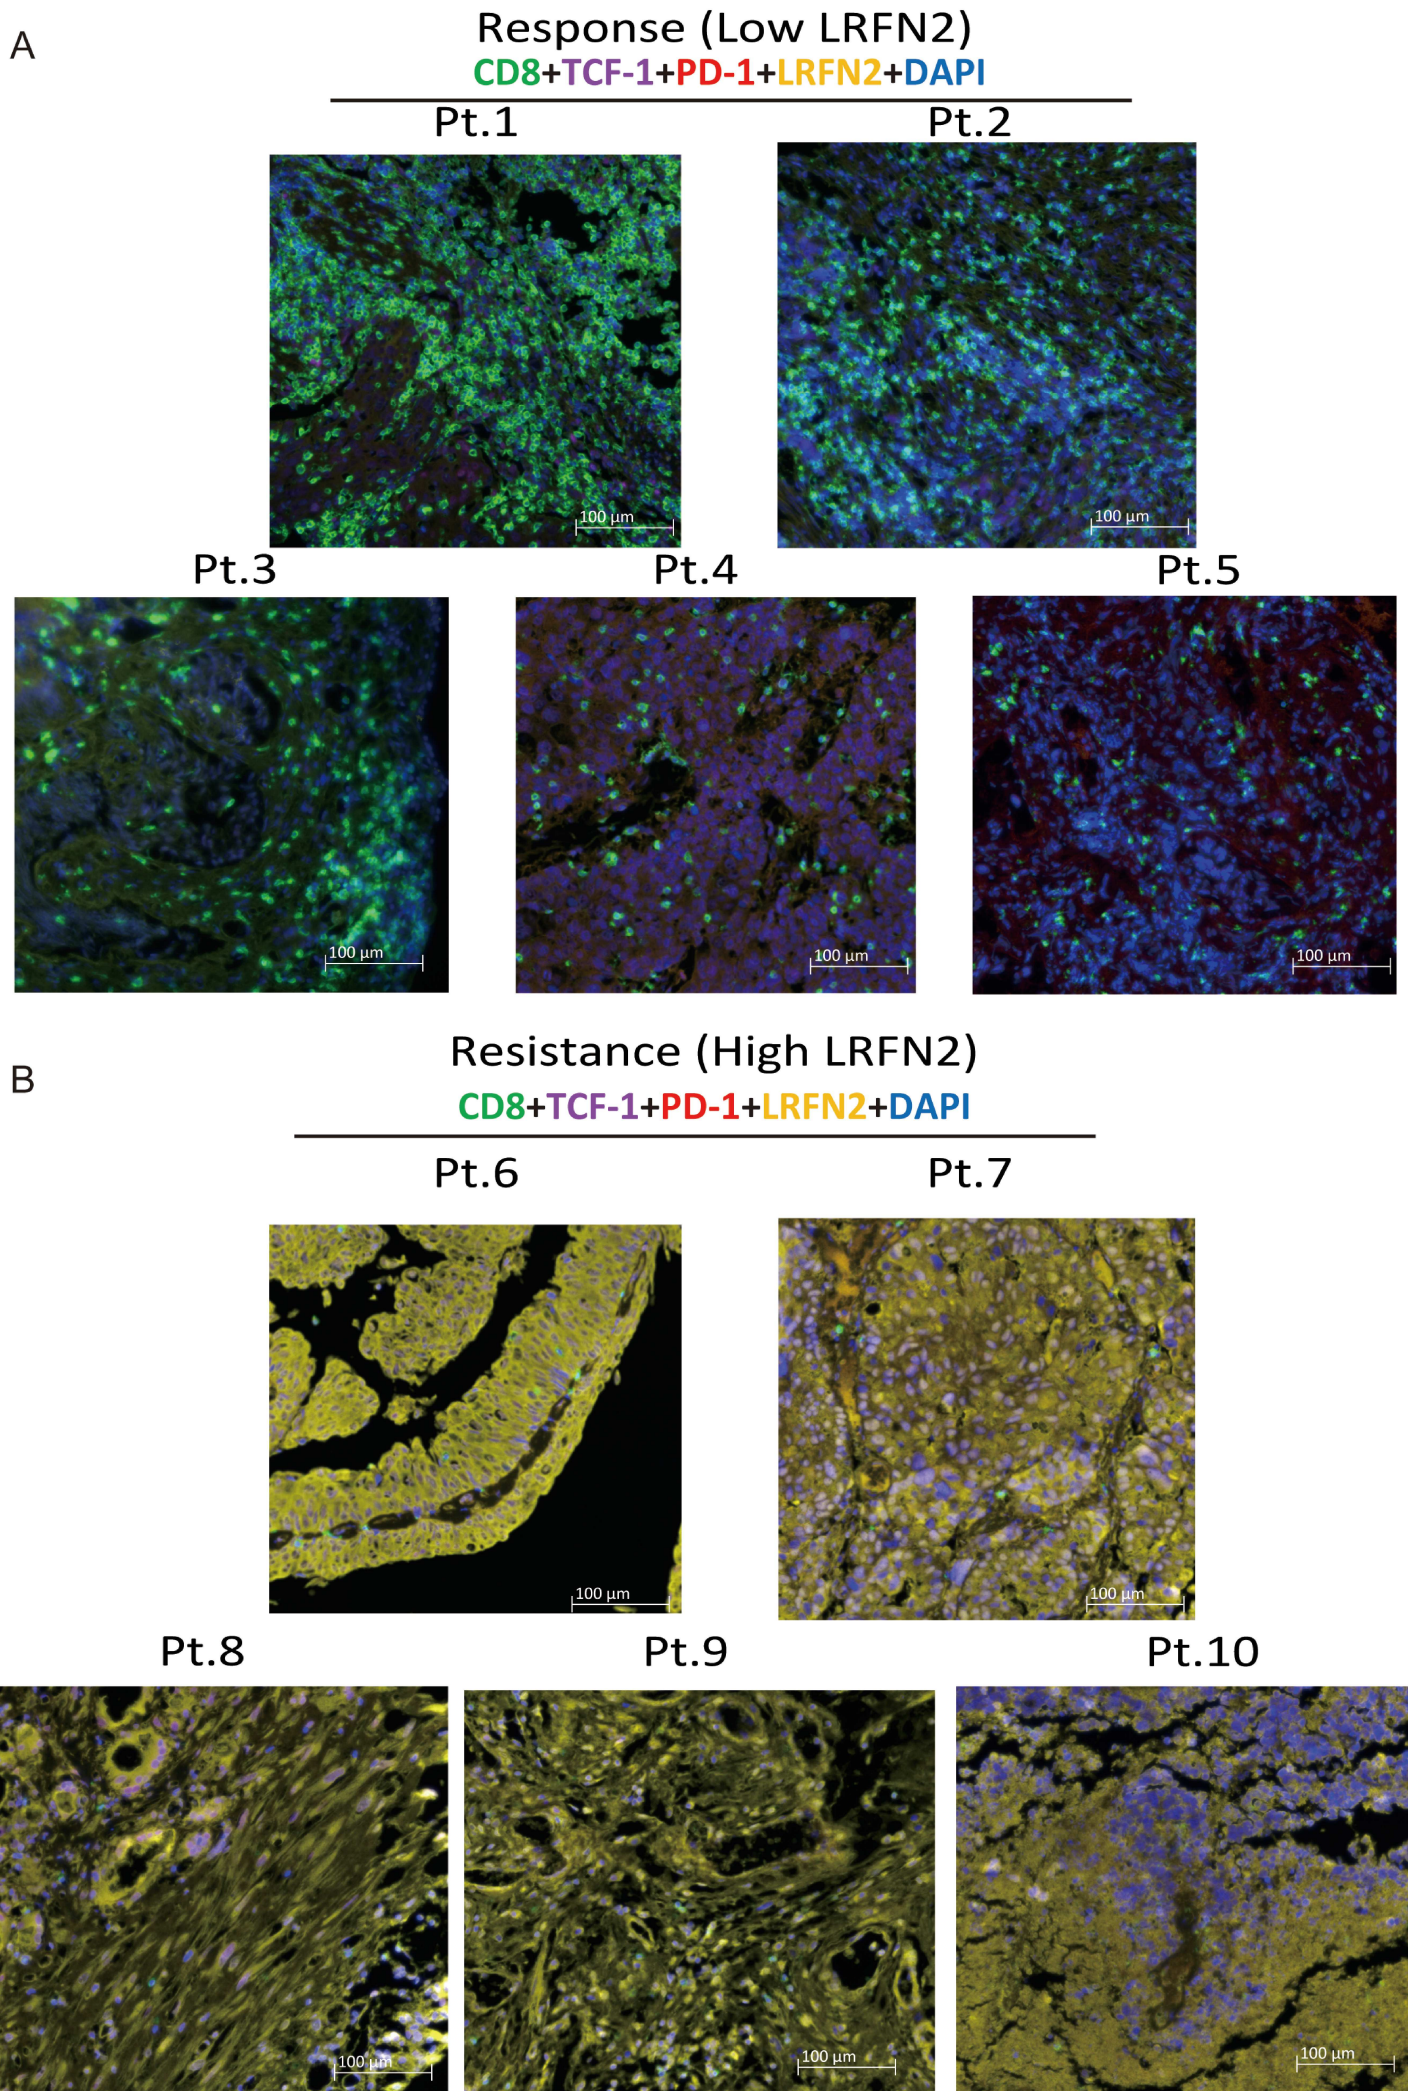

Supplement: jitc-2023-007230supp023.pdf [file jitc-2023-007230supp023.pdf]

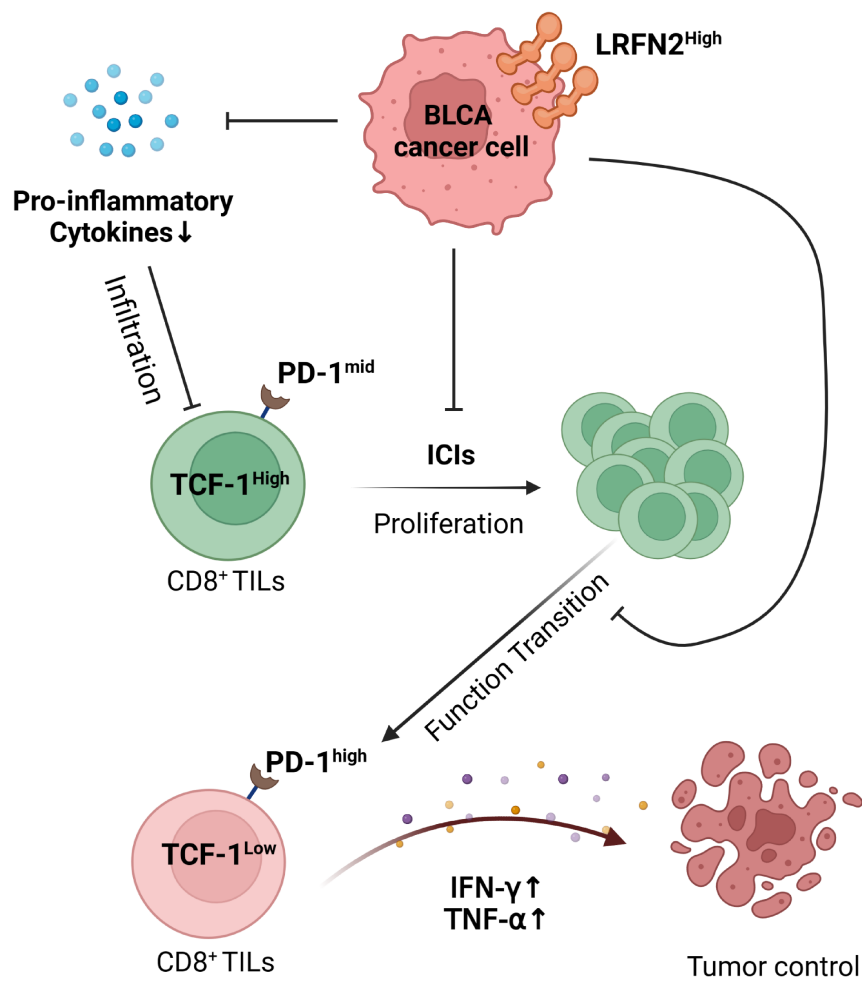

Supplement: jitc-2023-007230supp024.pdf [file jitc-2023-007230supp024.pdf]
